# Supplementary material for: Development of a self-reported reflective tool on advanced access to support primary healthcare providers: study protocol of a mixed-method research design using an e-Delphi survey
Source: PubMed Central journal article supplement — BMJ Open. 2021 Nov 8;11(11):e046411. doi: 10.1136/bmjopen-2020-046411 (PMC8576468; doi:10.1136/bmjopen-2020-046411), 2021-11-08
Supplement: bmjopen-2020-046411.draft_revisions.pdf [file bmjopen-2020-046411.draft_revisions.pdf]

# BMJ Open

BMJ Open is committed to open peer review. As part of this commitment we make the peer review history of every article we publish publicly available.

When an article is published we post the peer reviewers' comments and the authors' responses online. We also post the versions of the paper that were used during peer review. These are the versions that the peer review comments apply to.

The versions of the paper that follow are the versions that were submitted during the peer review process. They are not the versions of record or the final published versions. They should not be cited or distributed as the published version of this manuscript.

BMJ Open is an open access journal and the full, final, typeset and author-corrected version of record of the manuscript is available on our site with no access controls, subscription charges or pay-per-view fees (<http://bmjopen.bmj.com>).

If you have any questions on BMJ Open's open peer review process please email [info.bmjopen@bmj.com](mailto:info.bmjopen@bmj.com)

# BMJ Open

## Development of a self-reported reflective tool for the implementation of advanced access for primary healthcare providers: Study protocol of a mixed method using a e-Delphi survey.

|                               |                                                                                                                                                                                                                                                                                                                                                                                                                                                                                                                                                                                                                                                                                                                                                                                                                                                                                                                                                                                                                |
|-------------------------------|----------------------------------------------------------------------------------------------------------------------------------------------------------------------------------------------------------------------------------------------------------------------------------------------------------------------------------------------------------------------------------------------------------------------------------------------------------------------------------------------------------------------------------------------------------------------------------------------------------------------------------------------------------------------------------------------------------------------------------------------------------------------------------------------------------------------------------------------------------------------------------------------------------------------------------------------------------------------------------------------------------------|
| Journal:                      | <i>BMJ Open</i>                                                                                                                                                                                                                                                                                                                                                                                                                                                                                                                                                                                                                                                                                                                                                                                                                                                                                                                                                                                                |
| Manuscript ID                 | bmjopen-2020-046411                                                                                                                                                                                                                                                                                                                                                                                                                                                                                                                                                                                                                                                                                                                                                                                                                                                                                                                                                                                            |
| Article Type:                 | Protocol                                                                                                                                                                                                                                                                                                                                                                                                                                                                                                                                                                                                                                                                                                                                                                                                                                                                                                                                                                                                       |
| Date Submitted by the Author: | 29-Oct-2020                                                                                                                                                                                                                                                                                                                                                                                                                                                                                                                                                                                                                                                                                                                                                                                                                                                                                                                                                                                                    |
| Complete List of Authors:     | Breton, Mylaine; University of Sherbrooke, Faculty of Medicine and Health Sciences, Department of Community Health<br>Gaboury, Isabelle; Université de Sherbrooke Faculté de médecine et des sciences de la santé, Department of Family Medicine and Emergency Medicine<br>Sasseville, Maxime; Université du Québec à Chicoutimi, Department of Health Sciences<br>Beaulieu, Christine; University of Sherbrooke, Faculty of Medicine and Health Sciences<br>Abou Malham, Sabina; University of Sherbrooke, Faculty of Medicine and Health Sciences<br>Hudon, catherine; Université de Sherbrooke, Faculty of Medicine and Health Sciences; Centre de recherche du CHUS<br>Rodrigues, Isabel; Université de Montréal Faculté de Médecine<br>Maillet, Lara; ENAP, National School of Public Administration<br>Duhoux, Arnaud; Université de Montréal,<br>Deville-Stoetzel, Nadia; University of Sherbrooke, Faculty of Medicine and Health Sciences<br>Haggerty, Jeannie; McGill University, Family of Medicine |
| Keywords:                     | PRIMARY CARE, Organisation of health services < HEALTH SERVICES ADMINISTRATION & MANAGEMENT, Quality in health care < HEALTH SERVICES ADMINISTRATION & MANAGEMENT                                                                                                                                                                                                                                                                                                                                                                                                                                                                                                                                                                                                                                                                                                                                                                                                                                              |
|                               |                                                                                                                                                                                                                                                                                                                                                                                                                                                                                                                                                                                                                                                                                                                                                                                                                                                                                                                                                                                                                |

SCHOLARONE™  
Manuscripts

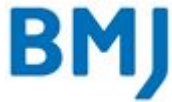

I, the Submitting Author has the right to grant and does grant on behalf of all authors of the Work (as defined in the below author licence), an exclusive licence and/or a non-exclusive licence for contributions from authors who are: i) UK Crown employees; ii) where BMJ has agreed a CC-BY licence shall apply, and/or iii) in accordance with the terms applicable for US Federal Government officers or employees acting as part of their official duties; on a worldwide, perpetual, irrevocable, royalty-free basis to BMJ Publishing Group Ltd ("BMJ") its licensees and where the relevant Journal is co-owned by BMJ to the co-owners of the Journal, to publish the Work in this journal and any other BMJ products and to exploit all rights, as set out in our [licence](#).

The Submitting Author accepts and understands that any supply made under these terms is made by BMJ to the Submitting Author unless you are acting as an employee on behalf of your employer or a postgraduate student of an affiliated institution which is paying any applicable article publishing charge ("APC") for Open Access articles. Where the Submitting Author wishes to make the Work available on an Open Access basis (and intends to pay the relevant APC), the terms of reuse of such Open Access shall be governed by a Creative Commons licence – details of these licences and which [Creative Commons](#) licence will apply to this Work are set out in our licence referred to above.

Other than as permitted in any relevant BMJ Author's Self Archiving Policies, I confirm this Work has not been accepted for publication elsewhere, is not being considered for publication elsewhere and does not duplicate material already published. I confirm all authors consent to publication of this Work and authorise the granting of this licence.

AA Reflective tool development

# Development of a self-reported reflective tool for the implementation of advanced access for primary healthcare providers: Study protocol of a mixed method using a e-Delphi survey

## AUTHORS

Mylaine Breton<sup>1\*</sup>, Isabelle Gaboury<sup>1</sup>, Maxime Sasseville<sup>2</sup>, Christine Beaulieu<sup>1</sup> Sabina Abou Malham<sup>1</sup>, Catherine Hudon<sup>1,3</sup>, Isabel Rodrigues<sup>4</sup>, Lara Maillet<sup>5</sup>, Arnaud Duhoux<sup>6</sup> Nadia Deville-Stoetzel<sup>1</sup>, Jeannie Haggerty<sup>7</sup>

## AUTHORS AFFILIATIONS

1 Faculty of Medicine and Health Sciences, Université de Sherbrooke, Longueuil, QC J4K 0A8, Canada.

2 Department of Health Sciences, Université du Québec à Chicoutimi, Saguenay, G7H 2B1, Canada.

3 Centre de recherche du CHUS, Sherbrooke, QC J1H 5N4, Canada

4 Faculty of Medicine, Université de Montréal, Montréal, QC H3C 3J7, Canada

5 École Nationale d'Administration Publique, Montréal, QC G1K 9E5, Canada

6 Faculty of Nursing, Université de Montréal, Montréal, QC H3C 3J7, Canada

7 Faculty of Medicine, McGill University, Montréal, QC H3G 2M1, Canada

## CORRESPONDING AUTHOR

Mylaine Breton, MBA, Ph.D.

Associate professor - Université de Sherbrooke - Campus Longueuil

## AA Reflective tool development

Canada Research Chair - Clinical Governance in Primary Health Care (Tier 2)

150 Place Charles-Le Moyne, Office 200, Longueuil, Canada, J4K0A8

Phone: 514-216-4033 (Canada), 857-654-3748 (US)

Email: [mylaine.breton@usherbrooke.ca](mailto:mylaine.breton@usherbrooke.ca)

**WORD COUNT:** 3455

## ABSTRACT

### Introduction

Timely access is one of the cornerstones of strong primary healthcare (PHC). New models to increase timely access have emerged across the world, including advanced access (AA). Recently in Quebec, Canada, the AA model has spread widely across the province. The model has largely been implemented by PHC professionals with important variations but a tool to evaluate its implementation is lacking. The general objective of this study is to develop a self-reported online reflective tool that will guide PHC professionals' reflection on their individual AA practice and formulation of recommendations for improvement. Specific objectives are: 1) Operationalization of the pillars and sub-pillars of AA; 2) Development of a self-reported questionnaire; and 3) Evaluation of the psychometrics.

### Methods and analysis

The pillars composing the original model of AA will first be reviewed in collaboration with PHC professional and stakeholders, patients, and researchers in a face-to-face meeting. The goals of the consultation are to establish consensus on the pillars and sub-pillars of AA. Leading from these definitions, items will be identified for their evaluation through an e-Delphi consultation. Three rounds are planned in 2020-2021 with a group of 25 experts. A repository of recommendations

## AA Reflective tool development

on how to improve one's AA practice will be populated based on the literature and nurtured by our experts throughout the consultation. Median and measures of dispersions will be used to evaluate agreement. The resulting tool will be evaluated by PHC professionals for psychometrics in 2021.

### **Ethics and dissemination**

The protocol has been approved by the Scientific Research Committee and ethics provided by the Research Ethics Board of the Centre Intégré de Santé et de Services Sociaux de la Montérégie-Centre (2020-441, CP 980475). Dissemination plan is a mix of community diffusion through and for our partners and to the scientific community in peer-reviewed journals and conferences.

**Keywords:** Advanced Access, Reflective tool, Primary healthcare, Timely access, Self-reported, Delphi consultation

### **STRENGTHS AND LIMITATIONS OF THIS STUDY**

- Provides a rigorously-developed up-to-date tool on advanced access based on the literature and on the experiences of various primary healthcare stakeholders in response to their expressed needs.
- Involves the participation of multiple stakeholders with different roles and attached to diverse organisation originating from multiple environments including urban, rural and remote regions.
- Allows for individual self-assessment.
- Allows users to obtain pragmatic and personalized recommendations on their AA practice.
- Development in French only with local experts (applicable to the current situation in Quebec).

AA Reflective tool development

## INTRODUCTION

### Advanced Access model

Timely access is widely recognized as a cornerstone of effective primary healthcare (PHC). The Advanced Access (AA) model, developed to increase timely access, has been promoted and adopted in primary care settings in various countries. It is the most commonly used organizational model to reduce wait times for primary care appointments.[1] Timely access is one of the guiding principles of the Patient-centered Medical Home (PCMH).[2] The five pillars of AA complement the PCHM model (timely access, comprehensiveness, continuity, interprofessional collaboration) and emphasize organizational components. This organizational model is defined according to five pillars:[3,4] 1) Balance supply and demand; 2) Reduce the backlog of previously scheduled appointments; 3) Review the appointment system; 4) Integrate inter-professional practice; and 5) Develop contingency plans (see Figure 1). The effectiveness of AA has been demonstrated in various healthcare systems.[5–9] Many studies have shown benefits of AA in terms of reduced wait times,[5,6,9–11] fewer missed appointments,[5,10] increased professional,[8,12] patient satisfaction[5] and provider productivity[9]. The AA model is perfectly in line with the organizational guiding principles for a high-quality-high-performance primary care organization as put forward by the College of Family Physicians of Canada.[13,14] That said, even if the conceptualization of AA developed more than 20 years ago by Murray et al. remains current, its conceptualization needs to be adapted to the contemporary context, as a growing number of providers have implemented AA and seek to improve their practice, as well as interdisciplinary practices. This study contributes to redefine AA based on more interdisciplinary-based team and current practices.

Please insert figure 1 here

### Historical background of research on advanced access

## AA Reflective tool development

1  
2  
3 In Quebec, AA was first introduced in 2012, and since then it has been widely promoted by the  
4  
5 Quebec College of Family Physicians, as well as by the Ministry of Health and Social Services.[15]  
6  
7 Family physicians are strongly encouraged to implement an AA model based on the five pillars  
8  
9 based on Murray's AA model. Over the past six years, the majority of primary healthcare family  
10  
11 physicians in Quebec have implemented AA in their organizations at varying levels of  
12  
13 implementation.  
14

15  
16 Our research team conducted the first two studies (2014, 2016) on the implementation of AA in  
17  
18 Quebec with early adopters of the model; one with family physicians,[15] and the other with  
19  
20 university family medicine groups.[4] Our results showed a wide variation in the level of  
21  
22 implementation of AA among PHC organizations as well as among PHC providers within the same  
23  
24 organization. We are currently conducting a study to get a portrait of the implementation of AA  
25  
26 in all university family medicine groups across Quebec to better understand the influence of the  
27  
28 contextual factors on the level of implementation of AA and also on outcomes.[16]  
29  
30

### **An expressed need for a reflective tool**

31  
32  
33  
34 There is still a need to guide improvement of the implementation of each pillar of AA within PHC  
35  
36 clinics. Several guides have been developed in Canada,[17–19] the United States[20–22] and  
37  
38 Europe[23] to assist PHC professionals and/or organizations to plan and implement AA. These  
39  
40 guides offer recommendations to plan supply, reduce demand, and organize appointment  
41  
42 management in order to achieve and maintain a balance between supply and demand, thus  
43  
44 enabling timely responses to patient requests. The guides generally offer recommendations based  
45  
46 on the five pillars of AA developed by Murray et al.,[3] as well as indicators to assess some of the  
47  
48 aspects of AA in PHC settings at the individual or team level. There is nevertheless no tool to guide  
49  
50 the improvement of AA implementation and sustainability. This project was therefore developed  
51  
52 in response to a clearly expressed ministerial desire to meet the needs of PHC professionals to be  
53  
54  
55  
56  
57  
58  
59  
60



## AA Reflective tool development

1  
2 supported in the implementation of AA in PHC settings. This study will provide an online reflective  
3  
4 tool that will be used as requested by primary healthcare professionals seeking to improve their  
5  
6 level of implementation of AA.  
7  
8

9  
10 Self-reported tools are useful reflective strategies to support quality improvement as they are  
11  
12 easily accessible and available when needed, regardless of location. These tools also provide an  
13  
14 effective way to promote self-reflection and identification of strengths and areas in need.[24]  
15  
16 Some tools, available online, provide diagnosis, document or assess a level of practice or  
17  
18 alignment with goals such as those of the tool developed by the College of Family physician in  
19  
20 Canada to assess the Patient-centered Medical Home[25] or the UHC (Universal Health Coverage)  
21  
22 Primary Health Care Self-Assessment Tool.[26] Online tools sometimes also offer a reflective  
23  
24 perspective to provide actionable advice[25] or immediate results and guidance.[27] Our self-  
25  
26 reported reflective tool will be developed with precisely these objectives to improve AA  
27  
28 implementation and sustainability.  
29  
30  
31

32  
33 There is a need to develop a self-reported online reflective tool to support AA implementation by  
34  
35 PHC providers. In order to develop a tool to assess the level of implementation of AA, it is  
36  
37 important to ensure that there is consensus on the model that will serve as a basis. A difference  
38  
39 in the definition or interpretation of the pillars of the model can lead to operationalization  
40  
41 difficulties that can and should be avoided.  
42  
43  
44  
45

## OBJECTIVES

46  
47  
48  
49 The main objective of this study is to develop a self-reported reflective tool to support PHC  
50  
51 providers to improve their AA practice.  
52  
53

54  
55 The specific objectives are to:  
56  
57  
58  
59  
60

## AA Reflective tool development

- 1) Operationalize the pillars and sub-pillars of the AA model;
- 2) Develop a self-reported questionnaire on their practice in AA,
  - 2.1 Develop a questionnaire to assess the level of implementation of the AA model
  - 2.2 Identify key recommendations to improve AA
- 3) Evaluate the psychometrics of the tool.

The main deliverable of our study will be a self-reported reflective tool on AA that will be combined with a repository of recommendations for improving AA, available on an electronic platform easily accessible to PHC providers and teams. Providers will thus be able to receive, in one place, an evaluation of their AA practice and personalized recommendations to support improvement.

## METHODS

### Study design overview

This study follows a modified Delphi methodology combining a literature review, analysis of the selected articles to identify different conceptual constructs and an iterative consensus achievement process using a face-to-face meeting with key experts and a e-survey in order to develop a reflective tool and identify strategies to improve AA. Using an iterative process, a Delphi consultation is an effective technique designed to obtain the most reliable consensus within a group of experts regardless of their geographical spread;<sup>[28–30]</sup> here, a group of experts from the province of Québec composed of various type of providers such as family physicians, nurse practitioners, nurses, front-desk and administrative staff and policymakers. Grounding the initial Delphi round in concepts derived from literature and based on initial experts input during the face-to-face meeting will both be efficient, and will stimulate participation in the following steps of the tool development. When an online survey tool is applied, the term e-Delphi (electronic) is

## AA Reflective tool development

used.[31]

The overall process will require three sequential phases: phase 1 being qualitative, while phases 2 and 3 being mostly quantitative. Table 1 briefly presents all three phases with their specific objectives. Phase 1 consists of a face-to-face meeting. This pre e-Delphi consultation aims to establish common bases in the operationalization of a revised AA model (objective 1). Phase 2 will consist of a three-round consultation to identify the content of the self-reported reflective tool. Phase 3 will follow to assess the developed reflective tool and its applicability to different PHC professionals and in different PHC environments. The AA self-reported reflective tool aims to provide a score on each pillar, that will allow its users to grasp their strengths and weaknesses with respect to their implementation of AA and context of practice.

**Table 1: The AA reflective tool development in brief**

|                                                                                                                                                                                                                          |                                                                                                                                                                                                                                                                                                                                                                                                                                                                                                                                                                                                                                                             |
|--------------------------------------------------------------------------------------------------------------------------------------------------------------------------------------------------------------------------|-------------------------------------------------------------------------------------------------------------------------------------------------------------------------------------------------------------------------------------------------------------------------------------------------------------------------------------------------------------------------------------------------------------------------------------------------------------------------------------------------------------------------------------------------------------------------------------------------------------------------------------------------------------|
| <p><b>Phase 1</b><br/> <b>Pre-Delphi consultation</b><br/>           Establishing common bases<br/>           – Operationalize the AA model</p>                                                                          | <ul style="list-style-type: none"> <li>- Research team identifies AA pillars and definitions from the literature</li> <li>- Identification and recruitment of AA experts</li> <li>- Consensus building on pillars and brainstorming about sub-pillars of AA through a facilitated face-to-face meeting</li> </ul>                                                                                                                                                                                                                                                                                                                                           |
| <p><b>Phase 2</b><br/> <b>e-Delphi consultation</b><br/>           Creation of the AA reflective tool<br/>           (List of essential items to be assessed in the reflective tool by PHC practitioners/clinicians)</p> | <p><b>1st round of consultation</b></p> <ul style="list-style-type: none"> <li>- Panel expert agreements scores (from 1 to 9) on sub-pillars and definitions</li> <li>- Suggestions/comments for modification or addition to sub-pillars</li> </ul>                                                                                                                                                                                                                                                                                                                                                                                                         |
|                                                                                                                                                                                                                          | <p><b>2<sup>nd</sup> round of consultation</b></p> <ul style="list-style-type: none"> <li>- Global and individual feedback report from round 1 (Level of consensus achieved, global and individual expert panel scores)</li> <li>- Panel expert agreement scores (from 1 to 9) on new propositions and modification emerging from round 1</li> <li>- Panel expert agreement scores (from 1 to 5) on the importance of each sub-pillar and the list of items to measure the level of implementation</li> <li>- Panel expert agreement (yes/no) on suggested response scales</li> <li>- Suggestions/comments for modification or addition of items</li> </ul> |

## AA Reflective tool development

|                                                                                                                                                                                                                                                   |                                                                                                                                                                                                                                                                                                                                                                                                                       |
|---------------------------------------------------------------------------------------------------------------------------------------------------------------------------------------------------------------------------------------------------|-----------------------------------------------------------------------------------------------------------------------------------------------------------------------------------------------------------------------------------------------------------------------------------------------------------------------------------------------------------------------------------------------------------------------|
|                                                                                                                                                                                                                                                   | <p><b>3<sup>rd</sup> round of consultation</b></p> <ul style="list-style-type: none"> <li>- Global and individual feedback report from round 2 (Level of consensus achieved, global and individual expert panel scores)</li> <li>- Consensus building on items by pillar and sub-pillar</li> <li>- Suggestions for practical recommendations by item to provide to clinicians to improve their AA practice</li> </ul> |
| <p style="text-align: center;"><b>Phase 3</b></p> <p style="text-align: center;"><b>Piloting, adjustment and development of a repository of recommendations</b></p> <p>To assess the tool and its applicability in different PHC environments</p> | <ul style="list-style-type: none"> <li>- Questionnaire completion by PHC clinicians in different PHC settings</li> <li>- Psychometric properties analyses</li> <li>- Focus groups for receiving feedbacks and improvement hints</li> <li>- Final adjustments</li> <li>- Development of a repository of recommendations with actionable guidance</li> </ul>                                                            |

**Study management**

This study will rely on a research team which includes researchers with AA and methodological expertise and PHC professionals, including family physicians and nurses. An advisory committee will oversee the development and ongoing processes of the study, as well as major decisions regarding the selection of AA experts to invite to the face-to-face meeting (Phase 1) and to the e-Delphi consultation (Phase 2).

**The expert panel**

To maximise the acceptability and usefulness of the reflective tool in Quebec's contemporary context, the advisory committee will establish an AA expert panel comprised of provincial and local decision-makers from the Quebec's Ministry of Health and Social Services, and from professional organisations that were involved in the first training initiatives for the implementation of AA.[32] PHC professionals from around the province who were early adopters of AA including family physicians, practitioner and clinical nurses, continuous quality improvement officers, front desk, and administrative staff, as well as patients and researchers working in the field of AA were invited.

## AA Reflective tool development

1  
2  
3  
4  
5  
6  
7  
8  
9  
10  
11  
12  
13  
14  
15  
16  
17  
Forty experts will be invited to join the expert panel, with the objective to have between 20 and 30 participants in both Phases 1 and 2. Purposive as well as a snowball sampling, will be used to recruit participants. Based on their expertise in AA implementation in Quebec PHC settings, the advisory committee will first identify potential participants who will then be invited by the principal investigators by email or telephone to join the expert panel. Snowball sampling will follow to ensure broad representation of diverse organizations as well as various roles within PHC clinics.

18  
19  
20  
21  
22  
23  
24  
25  
26  
27  
28  
29  
The ideal number of experts for a Delphi process is not set in stone; recommendations vary between 10 to 18 to ensure the development of productive group dynamics and to maximize chances of reaching consensus among experts.[31] Around 20 experts will be invited to participate to the e-Delphi consultation, with the goal to reach a minimum of 70% of participation at each round.[31,33]

**Phase 1: Operationalization of the AA model**

30  
31  
32  
33  
34  
35  
36  
37  
38  
39  
40  
41  
42  
43  
44  
45  
Building a consensus around the AA model will first entail agreeing on the pillars and sub-pillars that are essential to integrate in an AA practice in PHC. The starting point will be the conceptual framework of the five guiding principles of AA developed by Murray and Berwick in 2003:[3] 1) Balance supply and demand; 2) Reduce the backlog of previously scheduled appointments; 3) Review the appointment system; 4) Integrate inter-professional practice; and 5) Develop contingency plans (see Figure 1).

46  
47  
48  
49  
50  
51  
52  
53  
54  
55  
56  
57  
58  
59  
60  
Phase 1 will consist of a literature review to conceptualize a revised AA model. The literature review will include scientific studies and grey literature reports at local, national, and international levels. This scan will allow us to delineate the pillars and sub-pillars as defined in models of AA in the contemporary literature, as well as constructs that need to be measured within each sub-pillar.

## AA Reflective tool development

1  
2  
3 Following revision by the advisory committee, the revised AA model will be submitted to the AA  
4 expert panel in a face-to-face meeting and discussions intended toward consensus will take place  
5 while further refining the pillars and definitions. This in-person meeting will be highly interactive  
6 and the use of facilitation techniques for group consultations will encourage everyone's  
7 participation. The meeting will be organized in two steps. First, a variation of a "World Café" will  
8 be used to initiate and lead a collective reflection around the AA pillars and definition identified  
9 by the advisory committee. A World Café is a simple yet powerful method, originated by Juanita  
10 Brown, to enable meaningful conversations driven completely by participants and the topics that  
11 are relevant and important to them.[33,34] As a second step, a "carousel brainstorming"  
12 technique will be used with AA experts to brainstorm on important components to be included in  
13 each pillar. A Carousel Activity is a communicative and interactive opportunity for participants to  
14 get up and move around a room in a circular fashion, stopping intermittently to comment, discuss,  
15 or respond in writing to probing headings/questions/topics/themes posted by a facilitator that is  
16 related to a given topic/theme.[35] This technique allows for small group discussion, followed by  
17 whole-group collective reflection.[36] Facilitation techniques ensure that everyone is able to  
18 participate equally and is able to express his/her viewpoint freely, while ignoring hierarchical  
19 concerns.[37] The results of this meeting will be analyzed by the advisory committee to come to  
20 a consensus on the conceptual model of AA including the name, number of pillars, and definition  
21 of each identified pillar. This will serve as groundwork for the e-Delphi consultation.  
22  
23  
24  
25  
26  
27  
28  
29  
30  
31  
32  
33  
34  
35  
36  
37  
38  
39  
40  
41  
42  
43  
44  
45

### **Phase 2: Creation of the AA reflective tool through e-Delphi consultation**

46  
47  
48 For this phase, an online survey tool will be used (Survey Monkey platform). After each round, a  
49 personalized report will be sent to each AA expert providing an overall view of responses as well  
50 as their own, in an anonymized format. A list of items to evaluate the various pillars and sub-  
51 pillars developed during Phase 1 will be reviewed and adapted by the advisory committee before  
52  
53  
54  
55  
56  
57  
58  
59  
60

## AA Reflective tool development

1  
2  
3 its submission to the expert panel. The mandate of the panel will be to set the importance of the  
4  
5 suggested items for each of the sub-pillars and to achieve a consensus on a final list of items,  
6  
7 considered to be very important or essential for the assessment of an AA practice. Experts will  
8  
9 also be surveyed regarding the adequacy of suggested response scales for each item of the  
10  
11 reflective AA tool.  
12

### Round 1

13  
14  
15  
16  
17 An individualized link to a personalized questionnaire will be sent to each AA expert. The first  
18  
19 round of consultation will propose sub-pillars that have emerged from Phase 1. For each of the  
20  
21 proposed sub-pillars, AA experts will be asked to indicate their level of agreement (on a scale of 1  
22  
23 to 9) regarding the relevance of this sub-pillar to the concept of AA. The median as well as  
24  
25 measures of dispersion will be used as indicators of the level of consensus. More specifically, items  
26  
27 with a median above 6 will be considered as being relevant. Similarly, items with a median score  
28  
29 below 3 will be considered irrelevant. The remaining items will be retained for the second round  
30  
31 of consultation. Experts will also be asked to comment on the sub-pillar and to provide their  
32  
33 definition, indicate if this sub-pillar is attached to the appropriate pillar, and add any sub-pillars  
34  
35 they think are missing along with suggested definitions.  
36  
37  
38  
39

### Round 2 and 3 surveys

40  
41  
42 A feedback report from the previous round will accompany each new round of questionnaires,  
43  
44 including the level of consensus achieved along with global and individual relevance scores for  
45  
46 each item. In round 2 and 3, AA experts will be given the opportunity to modify their initial  
47  
48 response in light of the answers provided from the group, so as to facilitate the group evolution  
49  
50 towards consensus[30,38]. They will also be asked to score new propositions and modifications  
51  
52 emerging from the previous round. The process will continue with further rounds until a  
53  
54 consensus on the relevance of each item is reached - or not.[30,38] The e-Delphi will cease when  
55  
56  
57  
58  
59  
60

## AA Reflective tool development

1  
2 an acceptable degree of consensus is reached.[39,40] Particular attention will be given following  
3  
4 each round to assess whether consensus has been reached over a particular round, or rather  
5  
6 evolved throughout the process, and whether the group's opinion has changed over the  
7  
8 rounds.[41]  
9  
10

### **Phase 3: Assessment and applicability of the newly developed AA reflective tool and development of a repository of recommendations**

11  
12  
13  
14  
15  
16  
17 Phase 2 will result in the creation of the online reflective tool based on the list of items for which  
18  
19 consensus was achieved, to rigorously assess the implementation of an AA practice. In an  
20  
21 additional exercise, some AA experts who participated in phases 1 and/or 2 will be consulted to  
22  
23 determine an appropriate score threshold for each pillar. We aim to determine a gradient of  
24  
25 scores allowing the reflective tool users to situate themselves on an implementation continuum  
26  
27 for each of the AA pillars, and to set goals towards an optimal practice.  
28  
29  
30

### **AA reflective tool refinement**

31  
32  
33  
34 Survey completion sessions will be organized with PHC professionals and staff in five different PHC  
35  
36 settings. These survey completion sessions will include feedback discussions on the completion of  
37  
38 the tool, and will be led by the research team. Following cognitive testing techniques[42], these  
39  
40 sessions are intended to identify items that are not clear or need to be reformulated, as well as  
41  
42 any difficulties encountered during completion of the questionnaire. Following this piloting and  
43  
44 development period, the AA reflective tool will be considered to be final, and ready to be  
45  
46 evaluated by a larger number of potential users.  
47  
48  
49

### **Development of a repository of recommendations**

50  
51  
52  
53 A repository of recommendations aligned with the different components of the revised AA model  
54  
55 will be created, in relation to the "portrait" obtained with the tool. This repository of  
56  
57  
58  
59  
60



## AA Reflective tool development

1  
2  
3 recommendations will be made available through the electronic platform, upon completion of the  
4  
5 evaluation using the AA reflective tool. Recommendations will be personalized according to the  
6  
7 professional “portrait” based on their score on each pillar, providing them with actionable  
8  
9 avenues. Such an approach was inspired by the primary care quality improvement tool of the  
10  
11 College of Family Physicians of Canada.[25]  
12

13  
14 The repository of recommendations will be inspired by systematic collation of best practices, by  
15  
16 reviewing the literature related to each of the components of AA (e.g., improving interprofessional  
17  
18 collaboration, optimization of telephone reception, managing escalation of emergencies) and  
19  
20 using feedback generated by the expert panel on the final e-Delphi round. The repository will be  
21  
22 expanded and refined during the third round of the e-Delphi and during the survey completion  
23  
24 sessions.  
25  
26

### **Assessing the psychometric properties of the Reflective tool**

27  
28  
29 The final step of development of the tool will consist of an evaluation of some of its psychometric  
30  
31 properties. To do so, we plan to recruit a minimum of 150 to 200 primary healthcare professionals  
32  
33 in more than 10 PHC clinics.[43] Following qualitative feedback, the first analysis will be at the  
34  
35 item level: after excluding items with more than 4% missing values, we will do an item  
36  
37 discrimination analysis to learn how well an item can discriminate between high and low  
38  
39 performers of the implementation of AA. Items with a lack of variation in responses – that are  
40  
41 either too easy to or too difficult to attain – will be reviewed for content and to ascertain whether  
42  
43 the response scale is adequate. Other properties tested will be the tool’s reliability (repeatability,  
44  
45 intra- and inter-reliability in different contexts or between different types of healthcare  
46  
47 professionals), and validity (construct validity with a confirmatory factor analysis). Finally, internal  
48  
49 consistency will be analyzed for each pillar and sub-pillar.  
50  
51  
52  
53  
54  
55  
56  
57  
58  
59  
60

AA Reflective tool development

### **Patient and public involvement**

One patient was part of the face-to-face meeting in phase 1. Also, five patient partners are part of broadly research infrastructure on AA carried out by the research group and has informed the needs for important elements of a reflective tool. We are aiming to invite our patient partners on the e-Delphi consultation and will make sure to have at least one patient representative on our expert committee.

### **Dissemination plan**

Dissemination plan for the study is a mix of community diffusion through and for our partner organizations and to the scientific community in a peer-reviewed journal and presented at relevant conferences. We will attempt to reach many primary healthcare professionals to let them know of our findings through professional organisations and by organising a symposium that will bring together our expert participants as well as colleagues from their organisations or from other organisations and PHC clinics.

## **DISCUSSION**

Scientific articles on the foundations of AA have been published over the past 20 years. During this time, interdisciplinary collaborative practice has evolved within PHC family practices with several healthcare professionals now being part of the PHC team. This study will help to redefine the foundations of the AA model by integrating an interdisciplinary team-based focus, while considering changes that have been put in place in PHC practices. The inclusion of various PHC stakeholders in the tool development process will allow the tool and its content to reflect realities experienced in the field. Participation of AA champions in the overall development process of the AA reflective tool will benefit the community's acceptance of the tool.

This study will provide a rigorously developed up-to-date AA reflective tool based on the literature and on the experiences of various PHC stakeholders, while providing a response to their expressed

## AA Reflective tool development

needs for a reflective tool. The newly developed reflective tool will be helpful as the Ministry of Health and Social Services and professional medical organisations are currently promoting AA in PHC settings.

The repository of recommendations developed in parallel with the tool will provide the AA tool users with advice in relation with their own AA evaluation, and provide pragmatic and personalized recommendations to improve their AA practice. This will all be conveniently available online.

The results dissemination plan for this study includes two components: a community diffusion element through and for our partner organizations involved in PHC, and a scientific community component. Elements and lessons learned from this study will be shared through multiple community media resources, including presentations and webinars, newsletters, and a symposium on AA initiated by the research team.

### List of abbreviations

AA: Advanced access

PHC: Primary healthcare

## DECLARATIONS

### Ethics approval and consent to participate

The protocol for this study has been reviewed and approved by the Scientific Research Committee and ethics provided by the Research Ethics Board of the Centre Intégré de Santé et de Services Sociaux de la Montérégie-Centre (CISSS MC) (2020-441, CP 980475).

AA Reflective tool development

### **Consent for publication**

Not applicable

### **Availability of data and material**

Not applicable

### **Authors' contributions**

MB and IG led the conceptualization and design of the study, but all authors were involved. MB, IG and CB will lead the coordination of the study. MB, IG and CB wrote the first draft and all authors critically reviewed it and provided comments to improve the manuscript. All authors read and approved the final version.

### **Competing interests**

The authors declare that they have no competing interests.

### **Funding**

This study received a two years funding from the Ministry of Health and Social Services of Quebec (MSSS) of \$500 000. The funding organization was not involved in the design of the study nor writing of the protocol (980475).

### **Acknowledgements**

The authors want to thank Meg Sears for scientific linguistic edition.

## AA Reflective tool development

## REFERENCES

- 1 Ansell D, Crispo JAG, Simard B, *et al.* Interventions to reduce wait times for primary care appointments: a systematic review. *BMC Health Serv Res* 2017;**17**:295. doi:10.1186/s12913-017-2219-y
- 2 Collège des médecins de famille du Canada. Une vision pour le Canada. La pratique de la médecine familiale : Le centre de médecine de famille. Mississauga, ON. 2011. [https://www.google.com/url?sa=t&rct=j&q=&esrc=s&source=web&cd=&cad=rja&uact=8&ved=2ahUKEwjyqbO75rjqAhU1YTUKHSQPDncQFjACegQIAxAB&url=https%3A%2F%2Fwww.cfpc.ca%2FuploadedFiles%2FAbout\\_Us%2FFM-Professional-Profile-FR.pdf&usg=AOvVaw3wJlJ3K5ttqlxdotLSRz5L](https://www.google.com/url?sa=t&rct=j&q=&esrc=s&source=web&cd=&cad=rja&uact=8&ved=2ahUKEwjyqbO75rjqAhU1YTUKHSQPDncQFjACegQIAxAB&url=https%3A%2F%2Fwww.cfpc.ca%2FuploadedFiles%2FAbout_Us%2FFM-Professional-Profile-FR.pdf&usg=AOvVaw3wJlJ3K5ttqlxdotLSRz5L)
- 3 Murray M, Berwick DM. Advanced access: reducing waiting and delays in primary care. *JAMA* 2003;**289**:1035–40.
- 4 Abou Malham S, Touati N, Maillet L, *et al.* What Are the Factors Influencing Implementation of Advanced Access in Family Medicine Units? A Cross-Case Comparison of Four Early Adopters in Quebec. *Int J Fam Med* 2017;**2017**:1–15. doi:10.1155/2017/1595406
- 5 Bundy DG, Randolph GD, Murray M, *et al.* Open access in primary care: results of a North Carolina pilot project. *Pediatrics* 2005;**116**:82–7.
- 6 Rose KD, Ross JS, Horwitz LI. Advanced access scheduling outcomes: a systematic review. *Arch Intern Med* 2011;**171**:1150–9. doi:10.1001/archinternmed.2011.168
- 7 Fournier J, Heale R, Rietze LL. I can't wait: advanced access decreases wait times in primary healthcare. *Healthc Q Tor Ont* 2012;**15**:64–8.
- 8 Hudec JC, MacDougall S, Rankin E. Advanced access appointments: Effects on family physician satisfaction, physicians' office income, and emergency department use. *Can Fam Physician Med Fam Can* 2010;**56**:e361–7.
- 9 Rivas J. Advanced Access Scheduling in Primary Care: A Synthesis of Evidence. *J Healthc Manag* 2020;**65**:171–84. doi:10.1097/JHM-D-19-00047
- 10 Belardi FG, Weir S, Craig FW. A controlled trial of an advanced access appointment system in a residency family medicine center. *Fam Med* 2004;**36**:341–5.
- 11 Bennett CC. A healthier future for all Australians: an overview of the final report of the National Health and Hospitals Reform Commission. *Med J Aust* 2009;**191**:383–7.
- 12 Ahluwalia S, Offredy M. A qualitative study of the impact of the implementation of advanced access in primary healthcare on the working lives of general practice staff. *BMC Fam Pract* 2005;**6**:39.
- 13 College of Family Physicians of Canada. Best Advice- Timely Access to Appointments in Family Practice. 2012. [https://portal.cfpc.ca/ResourcesDocs/uploadedFiles/Health\\_Policy/\\_PDFs/2012\\_Final\\_Best\\_Advice\\_Enhancing\\_Timely\\_Access.pdf](https://portal.cfpc.ca/ResourcesDocs/uploadedFiles/Health_Policy/_PDFs/2012_Final_Best_Advice_Enhancing_Timely_Access.pdf)

## AA Reflective tool development

- 14 Lemire F. Refreshing the Patient's Medical Home: New vision for providing exceptional care in family practice. *Can Fam Physician Med Fam Can* 2019;**65**:152.
- 15 Breton M, Maillet L, Paré I, *et al.* Perceptions of the first family physicians to adopt advanced access in the province of Quebec, Canada. *Int J Health Plann Manage* 2017;**32**:e316–32. doi:10.1002/hpm.2380
- 16 Breton M, Maillet L, Duhoux A, *et al.* Evaluation of the implementation and associated effects of advanced access in university family medicine groups: a study protocol. *BMC Fam Pract* 2020;**21**:41. doi:10.1186/s12875-020-01109-w
- 17 Brazeau S, Couture P, Karemere-Bimana H, *et al.* *Guide pour l'implantation de l'accès adapté: l'expérience d'une région : Laval*. Laval: : Centre intégré de santé et de services sociaux de Laval 2016.  
<http://www.santecom.qc.ca/Bibliothequevirtuelle/Laval/9782550744337.pdf> (accessed 17 Jul 2020).
- 18 Centre intégré de santé et de services sociaux du Bas Saint-Laurent. Outils, Zone professionnelle, Accès Adapté. 2020.<https://www.cisss-bsl.gouv.qc.ca/zone-professionnelle/acces-adapte/outils> (accessed 12 Aug 2020).
- 19 Health Quality Ontario. Quality Improvement e-Learning Modules: Timely Access to Primary Care. [hqontario.ca. https://www.hqontario.ca/Quality-Improvement/E-Learning-and-Events/E-Learning-Modules-Timely-Access-to-Primary-Care](https://www.hqontario.ca/Quality-Improvement/E-Learning-and-Events/E-Learning-Modules-Timely-Access-to-Primary-Care) (accessed 12 Aug 2020).
- 20 Institute of Medicine (U.S.), Kaplan G, Lopez MH, *et al.*, editors. *Transforming health care scheduling and access: getting to now*. Washington, D.C: : The National Academies Press 2015.
- 21 Lukas C, Meterko M, Mohr D, Marjorie, Seibert N. The implementation and effectiveness of advanced clinic access. 2004.[https://www.researchgate.net/publication/228478818\\_The\\_Implementation\\_and\\_Effectiveness\\_of\\_Advanced\\_Clinic\\_Access/citation/download](https://www.researchgate.net/publication/228478818_The_Implementation_and_Effectiveness_of_Advanced_Clinic_Access/citation/download)
- 22 Institute for Health Improvement. Primary Care Access. <http://www.ihl.org/Topics/PrimaryCareAccess/Pages/default.aspx> (accessed 12 Aug 2020).
- 23 Practice Management Network. Improving acces, responding to patients. A 'how-to' guide for GP practices. 2009.<https://www.choiceforum.org/docs/gpguide.pdf> (accessed 12 Aug 2020).
- 24 Stenov V, Wind G, Skinner T, *et al.* The potential of a self-assessment tool to identify healthcare professionals' strengths and areas in need of professional development to aid effective facilitation of group-based, person-centered diabetes education. *BMC Med Educ* 2017;**17**:166. doi:10.1186/s12909-017-1003-3
- 25 The College of Family Physicians of Canada. The self-assessment tool for the Patient's Medical Home. 2018.<https://patientsmedicalhome.ca/self-assess/> (accessed 12 Aug 2020).
- 26 The Joint Learning Network for Universal Health Coverage. UHC Primary Health Care Self-

## AA Reflective tool development

- 1  
2  
3 Assessment Tool. 2015.
- 4  
5 27 The American Medical Association. The Caregiver Self-Assessment Tool. Heal. Trust. Inf.  
6 Better Care. 2015.[https://www.healthinaging.org/tools-and-tips/caregiver-self-assessment-](https://www.healthinaging.org/tools-and-tips/caregiver-self-assessment-questionnaire)  
7 questionnaire (accessed 17 Aug 2020).
- 8  
9 28 Jünger S, Payne SA, Brine J, *et al.* Guidance on Conducting and REporting DELphi Studies  
10 (CREDES) in palliative care: Recommendations based on a methodological systematic  
11 review. *Palliat Med* 2017;**31**:684–706. doi:10.1177/0269216317690685
- 12  
13 29 Falzarano M, Pinto G. Seeking Consensus Through the Use of the Delphi Technique in Health  
14 Sciences Research. *J Allied Health* 2013;**42**:99–105.
- 15  
16 30 Hsu C-C, Sandford BA. The Delphi Technique: Making Sense of Consensus. *Pract Assess Res*  
17 *Eval* 2007;**12**:1–6. doi:10.7275/PDZ9-TH90
- 18  
19 31 Veugelers R, Gaakeer MI, Patka P, *et al.* Improving design choices in Delphi studies in  
20 medicine: the case of an exemplary physician multi-round panel study with 100% response.  
21 *BMC Med Res Methodol* 2020;**20**:156. doi:10.1186/s12874-020-01029-4
- 22  
23 32 Accès adapté, organisation de la pratique: L'accès adapté en un clic ! Fédération Médecins  
24 Omnipraticiens Qué. 2015.[https://www.fmoq.org/pratique/organisation-de-la-](https://www.fmoq.org/pratique/organisation-de-la-pratique/acces-adapte/)  
25 pratique/acces-adapte/ (accessed 12 Aug 2020).
- 26  
27 33 Hyper Island. SessionLab. <https://www.sessionlab.com/methods/world-cafe> (accessed 12  
28 Aug 2020).
- 29  
30 34 The world cafe. 2020.[http://www.theworldcafe.com/key-concepts-resources/world-cafe-](http://www.theworldcafe.com/key-concepts-resources/world-cafe-method/)  
31 method/ (accessed 12 Aug 2020).
- 32  
33 35 Delgado RA. Carousel activity protocol. Utica Coll.  
34 2020.[https://www.uticaschools.org/site/handlers/filedownload.ashx?moduleinstanceid=%2](https://www.uticaschools.org/site/handlers/filedownload.ashx?moduleinstanceid=%20273&dataid=286&FileName=Carousel%20Activity%20Protocol.pdf)  
35 0273&dataid=286&FileName=Carousel%20Activity%20Protocol.pdf (accessed 12 Aug 2020).
- 36  
37 36 Simon CA. Strategy Guide: Brainstorming and Reviewing Using the Carousel Strategy.  
38 ReadWriteThink. 2020.[http://www.readwritethink.org/professional-development/strategy-](http://www.readwritethink.org/professional-development/strategy-guides/brainstorming-reviewing-using-carousel-30630.html)  
39 guides/brainstorming-reviewing-using-carousel-30630.html (accessed 12 Aug 2020).
- 40  
41 37 Liberating structures. 2020.<http://www.liberatingstructures.com/> (accessed 12 Aug 2020).
- 42  
43 38 Hsu C-C, Sandford B. Minimizing Non-Response in The Delphi Process: How to Respond to  
44 Non-Response. *Pract Assess Res Eval* 2007;**12**. doi:<https://doi.org/10.7275/by88-4025>
- 45  
46 39 J. Skulmoski G, T. Hartman F, Krahn J. The Delphi Method for Graduate Research. *J Inf*  
47 *Technol Educ Res* 2007;**6**:001–21. doi:10.28945/199
- 48  
49 40 de Villiers MR, de Villiers PJT, Kent AP. The Delphi technique in health sciences education  
50 research. *Med Teach* 2005;**27**:639–43.
- 51  
52 41 Holey EA, Feeley JL, Dixon J, *et al.* An exploration of the use of simple statistics to measure  
53  
54  
55  
56  
57  
58  
59  
60

## AA Reflective tool development

consensus and stability in Delphi studies. *BMC Med Res Methodol* 2007;**7**:52.

42 Willis GB. *Analysis of the cognitive interview in questionnaire design*. Oxford: : Oxford University Press 2015.

43 Martin CR; Hollins Martin CJ. Minimum sample size requirements for a validation study of the birth satisfaction scale-revised (BSS-R). *J Nurs Pract* 2017;**1**:25–30.

For peer review only



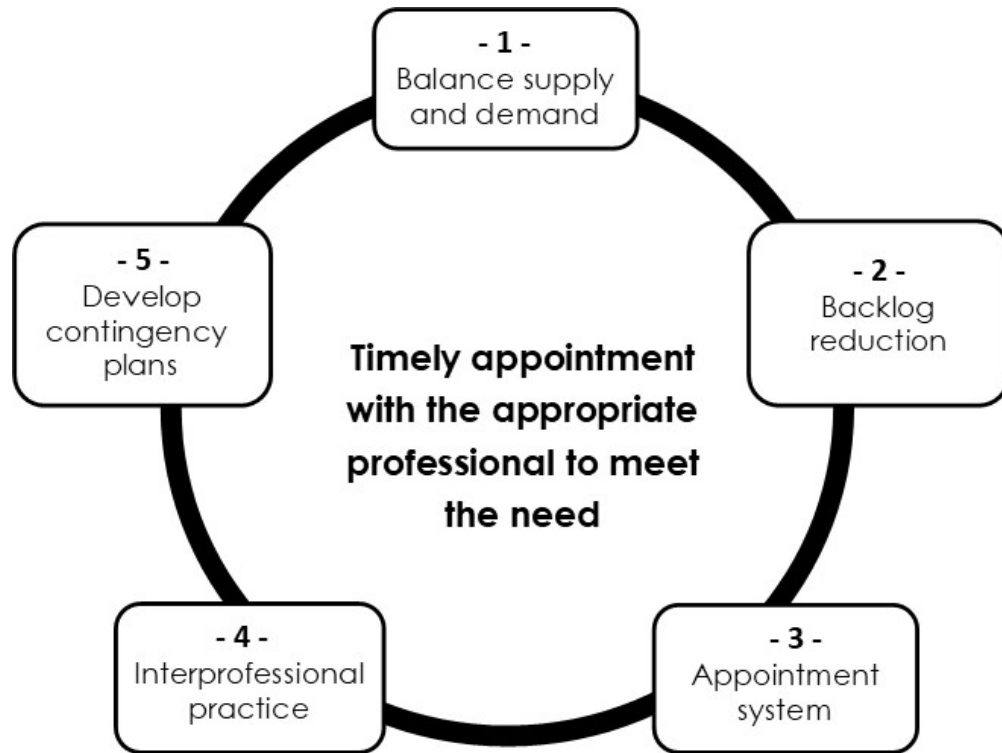

**Figure 1. The five pillars of advanced access**

167x162mm (100 x 100 DPI)

# BMJ Open

## Development of a self-reported reflective tool on advanced access to support primary healthcare providers: Study protocol of a mixed method using a e-Delphi survey

|                                 |                                                                                                                                                                                                                                                                                                                                                                                                                                                                                                                                                                                                                                                                                                                                                                                                                                                                                                                                                                                                                     |
|---------------------------------|---------------------------------------------------------------------------------------------------------------------------------------------------------------------------------------------------------------------------------------------------------------------------------------------------------------------------------------------------------------------------------------------------------------------------------------------------------------------------------------------------------------------------------------------------------------------------------------------------------------------------------------------------------------------------------------------------------------------------------------------------------------------------------------------------------------------------------------------------------------------------------------------------------------------------------------------------------------------------------------------------------------------|
| Journal:                        | <i>BMJ Open</i>                                                                                                                                                                                                                                                                                                                                                                                                                                                                                                                                                                                                                                                                                                                                                                                                                                                                                                                                                                                                     |
| Manuscript ID                   | bmjopen-2020-046411.R1                                                                                                                                                                                                                                                                                                                                                                                                                                                                                                                                                                                                                                                                                                                                                                                                                                                                                                                                                                                              |
| Article Type:                   | Protocol                                                                                                                                                                                                                                                                                                                                                                                                                                                                                                                                                                                                                                                                                                                                                                                                                                                                                                                                                                                                            |
| Date Submitted by the Author:   | 11-May-2021                                                                                                                                                                                                                                                                                                                                                                                                                                                                                                                                                                                                                                                                                                                                                                                                                                                                                                                                                                                                         |
| Complete List of Authors:       | Breton, Mylaine; University of Sherbrooke, Faculty of Medicine and Health Sciences, Department of Community Health<br>Gaboury, Isabelle; Université de Sherbrooke Faculté de médecine et des sciences de la santé, Department of Family Medicine and Emergency Medicine<br>Sasseville, Maxime; Université du Québec à Chicoutimi, Department of Health Sciences<br>Beaulieu, Christine; University of Sherbrooke, Faculty of Medicine and Health Sciences<br>Abou Malham, Sabina; University of Sherbrooke, Faculty of Medicine and Health Sciences<br>Hudon, catherine; Université de Sherbrooke, Faculty of Medicine and Health Sciences<br>Rodrigues, Isabel; Université de Montréal Faculté de Médecine<br>Maillet, Lara; Université du Québec à Montréal, École nationale d'administration publique - ENAP<br>Duhoux, Arnaud; Université de Montréal<br>Deville-Stoetzel, Nadia; University of Sherbrooke, Faculty of Medicine and Health Sciences<br>Haggerty, Jeannie; McGill University Faculty of Medicine |
| <b>Primary Subject Heading</b>: | General practice / Family practice                                                                                                                                                                                                                                                                                                                                                                                                                                                                                                                                                                                                                                                                                                                                                                                                                                                                                                                                                                                  |
| Secondary Subject Heading:      | Health services research                                                                                                                                                                                                                                                                                                                                                                                                                                                                                                                                                                                                                                                                                                                                                                                                                                                                                                                                                                                            |
| Keywords:                       | PRIMARY CARE, Organisation of health services < HEALTH SERVICES ADMINISTRATION & MANAGEMENT, Quality in health care < HEALTH SERVICES ADMINISTRATION & MANAGEMENT                                                                                                                                                                                                                                                                                                                                                                                                                                                                                                                                                                                                                                                                                                                                                                                                                                                   |
|                                 |                                                                                                                                                                                                                                                                                                                                                                                                                                                                                                                                                                                                                                                                                                                                                                                                                                                                                                                                                                                                                     |

SCHOLARONE™  
Manuscripts



I, the Submitting Author has the right to grant and does grant on behalf of all authors of the Work (as defined in the below author licence), an exclusive licence and/or a non-exclusive licence for contributions from authors who are: i) UK Crown employees; ii) where BMJ has agreed a CC-BY licence shall apply, and/or iii) in accordance with the terms applicable for US Federal Government officers or employees acting as part of their official duties; on a worldwide, perpetual, irrevocable, royalty-free basis to BMJ Publishing Group Ltd ("BMJ") its licensees and where the relevant Journal is co-owned by BMJ to the co-owners of the Journal, to publish the Work in this journal and any other BMJ products and to exploit all rights, as set out in our [licence](#).

The Submitting Author accepts and understands that any supply made under these terms is made by BMJ to the Submitting Author unless you are acting as an employee on behalf of your employer or a postgraduate student of an affiliated institution which is paying any applicable article publishing charge ("APC") for Open Access articles. Where the Submitting Author wishes to make the Work available on an Open Access basis (and intends to pay the relevant APC), the terms of reuse of such Open Access shall be governed by a Creative Commons licence – details of these licences and which [Creative Commons](#) licence will apply to this Work are set out in our licence referred to above.

Other than as permitted in any relevant BMJ Author's Self Archiving Policies, I confirm this Work has not been accepted for publication elsewhere, is not being considered for publication elsewhere and does not duplicate material already published. I confirm all authors consent to publication of this Work and authorise the granting of this licence.

AA Reflective tool development

# Development of a self-reported reflective tool on advanced access to support primary healthcare providers: Study protocol of a mixed method using a e-Delphi survey

## AUTHORS

Mylaine Breton<sup>1\*</sup>, Isabelle Gaboury<sup>1</sup>, Maxime Sasseville<sup>2</sup>, Christine Beaulieu<sup>1</sup> Sabina Abou Malham<sup>1</sup>, Catherine Hudon<sup>1,3</sup>, Isabel Rodrigues<sup>4</sup>, Lara Maillet<sup>5</sup>, Arnaud Duhoux<sup>6</sup> Nadia Deville-Stoetzel<sup>1</sup>, Jeannie Haggerty<sup>7</sup>

## AUTHORS AFFILIATIONS

1 Faculty of Medicine and Health Sciences, Université de Sherbrooke, Longueuil, QC J4K 0A8, Canada.

2 Department of Health Sciences, Université du Québec à Chicoutimi, Saguenay, G7H 2B1, Canada.

3 Centre de recherche du CHUS, Sherbrooke, QC J1H 5N4, Canada

4 Faculty of Medicine, Université de Montréal, Montréal, QC H3C 3J7, Canada

5 École Nationale d'Administration Publique, Montréal, QC G1K 9E5, Canada

6 Faculty of Nursing, Université de Montréal, Montréal, QC H3C 3J7, Canada

7 Faculty of Medicine, McGill University, Montréal, QC H3G 2M1, Canada

## CORRESPONDING AUTHOR

Mylaine Breton, MBA, Ph.D.

Associate professor - Université de Sherbrooke - Campus Longueuil

Canada Research Chair - Clinical Governance in Primary Health Care (Tier 2)

## AA Reflective tool development

150 Place Charles-Le Moyne, Office 200, Longueuil, Canada, J4K0A8

Phone: 514-216-4033 (Canada), 857-654-3748 (US)

Email: [mylaine.breton@usherbrooke.ca](mailto:mylaine.breton@usherbrooke.ca)

**WORD COUNT:** 3732

## ABSTRACT

### Introduction

Timely access is one of the cornerstones of strong primary healthcare (PHC). New models to increase timely access have emerged across the world, including advanced access (AA). Recently in Quebec, Canada, the AA model has spread widely across the province. The model has largely been implemented by PHC professionals with important variations; however, a tool to assess their practice improvement within AA is lacking. The general objective of this study is to develop a self-reported online reflective tool that will guide PHC professionals' reflection on their individual AA practice and formulation of recommendations for improvement. Specific objectives are: 1) Operationalization of the pillars and sub-pillars of AA; 2) Development of a self-reported questionnaire; and 3) Evaluation of the psychometrics.

### Methods and analysis

The pillars composing Murray's model of AA will first be reviewed in collaboration with PHC professional and stakeholders, patients, and researchers in a face-to-face meeting, with the goal to establish consensus on the pillars and sub-pillars of AA. Leading from these definitions, items will be identified for evaluation through an e-Delphi consultation. Three rounds are planned in 2020-21 with a group of 20-25 experts. A repository of recommendations on how to improve one's AA practice will be populated based on the literature and enriched by our experts

## AA Reflective tool development

1  
2 throughout the consultation. Median and measures of dispersions will be used to evaluate  
3  
4 agreement. The resulting tool will then be evaluated by PHC professionals for psychometrics in  
5  
6 2021-22.  
7  
8  
9

## 10 **Ethics and dissemination**

11  
12 The Centre Intégré de Santé et de Services Sociaux de la Montérégie-Centre Scientific Research  
13  
14 Committee approved the protocol, and the Research Ethics Board provided ethics approval (2020-  
15  
16 441, CP 980475). Dissemination plan is a mix of community diffusion through and for our partners  
17  
18 and to the scientific community including peer-reviewed publications and conference  
19  
20 presentations.  
21  
22  
23  
24  
25

26 **Keywords:** Advanced Access, Reflective tool, Primary healthcare, Timely access, Self-reported,  
27  
28 Delphi consultation  
29  
30

## 31 **STRENGTHS AND LIMITATIONS OF THIS STUDY**

- 32  
33  
34
- 35 • Provides a rigorously-developed up-to-date tool on advanced access based on the literature and  
36 on the experiences of various primary healthcare stakeholders in response to their expressed  
37 needs.  
38
  - 39 • Involves the participation of multiple stakeholders with different roles and attached to diverse  
40 organisation originating from multiple environments including urban, rural and remote regions.  
41
  - 42 • The Delphi method allows the experts to express their thoughts independently, while  
43 encouraging pragmatism, honesty and creativity.  
44
  - 45 • The developed tool may not be transferable without cultural adaptation to other settings where  
46 the principles of AA are implemented.  
47  
48  
49  
50  
51  
52  
53  
54  
55  
56  
57  
58  
59  
60

## INTRODUCTION

### Advanced Access model

Timely access is widely recognized as a cornerstone of effective primary healthcare (PHC). The Advanced Access (AA) model, developed to increase timely access, has been promoted and adopted in primary care settings in various countries. It is the most commonly used organizational model to reduce wait times for primary care appointments.[1] Timely access is one of the guiding principles of the Patient-centered Medical Home (PCMH).[2] The pillars of AA complement the PCMH model (timely access, comprehensiveness, continuity, interprofessional collaboration) and emphasize organizational components. AA has been defined according to five pillars:[3,4] 1) Balance supply and demand; 2) Reduce the backlog of previously scheduled appointments; 3) Review the appointment system; 4) Integrate inter-professional practice; and 5) Develop contingency plans (see Figure 1). The AA model was developed in the United States in 2001 and implemented in North America and Europe, with many studies in the USA, the United Kingdom and Canada and its effectiveness demonstrated in various healthcare systems.[5–9] Benefits of AA include reduced wait times,[5,6,9–11] fewer missed appointments,[5,10] and improved professional and [8,12] patient satisfaction,[5] and provider productivity.[9]

The AA model aligns with the organizational guiding principles for a high-quality-high-performance primary care organization as put forward by the College of Family Physicians of Canada.[13,14] That said, even if the concept of AA developed more than 20 years ago by Murray et al. remains current, it needs to be adapted to the contemporary context. This study contributes to refine AA based on more interdisciplinary-based team and the need to improve PHC practice with a quality improvement approach.

**Please insert figure 1 here**

AA Reflective tool development

### **Evolution of AA and state of research in the province of Quebec**

In Quebec, AA was first introduced in 2012, and since then it has been widely promoted by the Quebec College of Family Physicians, as well as by the Ministry of Health and Social Services.[15] Family physicians are strongly encouraged to implement an AA model based on the five pillars proposed by Murray et al.[3] Over the past six years, the majority of PHC family physicians in Quebec have introduced AA in their organizations at varying levels of implementation.[15, 4]

### **An expressed need for a reflective tool**

Several guides have been developed in Canada,[16–18] the United States[19–21] and Europe[22] to assist PHC professionals and/or organizations to plan and implement AA. These guides offer recommendations to plan supply, reduce demand, and organize appointment management in order to achieve and maintain a balance between supply and demand, thus enabling timely responses to patient requests. The guides generally present principles of AA, along with how to implement initial changes and some measurement tools. They also offer strategies to support the introduction of AA, but lack information and guidance to improve and sustain AA or to troubleshoot issues over time.

There is no tool even to evaluate the status of AA in a professional's practice, let alone to guide its continuous improvement and sustainability. Inspired by the principles of the Model for Improvement, [23] such a tool could be used to align metrics across multiple PHC providers, while operationalizing the complex process of providing access to care in a daily practice. One could use the developed tool to reflect upon one's practice and plan for modifications to improve patient access. This project was therefore developed in response to a clearly expressed ministerial desire to meet the needs of PHC professionals to be supported in the clinical integration and improvement of AA in PHC settings. This study will provide an online reflective tool that will be used as requested by primary healthcare professionals seeking to improve their AA practice.



## AA Reflective tool development

1  
2  
3  
4  
5  
6  
7  
8  
9  
10  
11  
12  
13  
14  
15  
16  
17  
18  
19  
20  
21  
22  
23  
24  
25  
26  
27  
28  
29  
30  
31  
32  
33  
34  
35  
36  
37  
38  
39  
40  
41  
42  
43  
44  
45  
46  
47  
48  
49  
50  
51  
52  
53  
54  
55  
56  
57  
58  
59  
60

Self-reported tools are useful reflective strategies to support quality improvement as they are easily accessible and available when needed, regardless of location. These tools also provide an effective way to promote self-reflection and identification of strengths and areas in need.[24]

Some tools available online, provide diagnosis, document or assess a level of practice or alignment with goals such as those of the tool developed by the College of Family Physicians in Canada to assess the Patient-centered Medical Home[25] or the Universal Health Coverage Primary Health Care Self-Assessment Tool.[26] Online tools may also offer a reflective perspective to provide actionable advice,[25] or immediate results and guidance.[27]

There is a need to develop a self-reported online reflective tool to support AA implementation and improvement by PHC providers. To achieve this objective, it is important to ensure that there is consensus on the underlying model. Differences in definition or interpretation of the pillars of AA could lead to operationalization difficulties, that can and should be avoided.

## OBJECTIVES

The main objective of this study is to develop a self-reported reflective tool to support PHC providers to improve their AA practice.

The specific objectives are to:

- 1) Operationalize the pillars and sub-pillars of the AA model;
- 2) Develop a self-reported questionnaire on their practice in AA,
  - 2.1 Develop a questionnaire to assess the level of implementation of the AA model
  - 2.2 Identify key recommendations to improve AA.
- 3) Evaluate the psychometrics of the tool.

The main deliverable of our study will be a self-reported reflective tool on AA that will be

## AA Reflective tool development

combined with a repository of recommendations to improve AA, available on an electronic platform easily accessible to PHC providers and teams. This includes: physicians, nurses and nurse practitioners, social workers, pharmacists, nutritionists, psychologists, etc. Users will receive, in one place, an evaluation of their AA practice and personalized recommendations to support improvement.

## METHODS

### Study design overview

A modified Delphi methodology will be used, to develop a reflective tool and identity strategies to improve AA. A literature review and analysis of selected articles will be used to identify conceptual constructs, followed by an iterative consensus achievement process among key experts including a face-to-face meeting and an online survey tool (e-Delphi).[28] Using an iterative process, a Delphi consultation is an effective technique designed to obtain the most reliable consensus within a group of experts regardless of their geographical spread.[29–31] A group of experts from the province of Québec will include diverse providers such as family physicians, nurse practitioners, nurses, front-desk and administrative staff and policymakers. Grounding the initial Delphi round in concepts derived from literature and based on initial experts' input during the face-to-face meeting will both be efficient, and will stimulate participation in the following steps of the tool development.

The process entails three sequential phases, with phase 1 being qualitative, while phases 2 and 3 being including quantitation. Table 1 briefly presents all three phases with their specific objectives. Phase 1 consists of a face-to-face meeting. This pre e-Delphi consultation aims to establish common bases in the operationalization of a revised AA model (objective 1). Phase 2 will consist of a three-round consultation to identify the content of the self-reported reflective tool.

## AA Reflective tool development

Phase 3 will follow to assess the developed reflective tool and its applicability to different PHC professionals and in different PHC environments.

The self-reported reflective tool aims to evaluate the processes associated with each AA pillar while allowing its users to grasp their strengths and weaknesses with respect to their level of implementation.

**Table 1: The AA reflective tool development in brief**

|                                                                                                                                                                                                                          |                                                                                                                                                                                                                                                                                                                                                                                                                                                                                                                                                                                                                                                               |
|--------------------------------------------------------------------------------------------------------------------------------------------------------------------------------------------------------------------------|---------------------------------------------------------------------------------------------------------------------------------------------------------------------------------------------------------------------------------------------------------------------------------------------------------------------------------------------------------------------------------------------------------------------------------------------------------------------------------------------------------------------------------------------------------------------------------------------------------------------------------------------------------------|
| <p><b>Phase 1</b><br/> <b>Pre-Delphi consultation</b><br/>           Establishing common bases<br/>           – Operationalize the AA model</p>                                                                          | <ul style="list-style-type: none"> <li>- Research team identifies AA pillars and definitions from the literature</li> <li>- Identification and recruitment of AA experts</li> <li>- Consensus building on pillars and brainstorming about sub-pillars of AA through a facilitated face-to-face meeting</li> </ul>                                                                                                                                                                                                                                                                                                                                             |
| <p><b>Phase 2</b><br/> <b>e-Delphi consultation</b><br/>           Creation of the AA reflective tool<br/>           (List of essential items to be assessed in the reflective tool by PHC practitioners/clinicians)</p> | <p><b>1st round of consultation</b></p> <ul style="list-style-type: none"> <li>- Panel expert agreement scores (from 1 to 9) on sub-pillars and definitions</li> <li>- Suggestions/comments for modification or addition to sub-pillars</li> </ul>                                                                                                                                                                                                                                                                                                                                                                                                            |
|                                                                                                                                                                                                                          | <p><b>2<sup>nd</sup> round of consultation</b></p> <ul style="list-style-type: none"> <li>- Global and individual feedback report from round 1 (Level of consensus achieved, global and individual expert panel scores)</li> <li>- Panel expert agreement scores (from 1 to 9) on new propositions and modification emerging from round 1</li> <li>- Panel expert agreement scores (from 1 to 5) on the importance of each sub-pillar and the list of items to measure their level of implementation</li> <li>- Panel expert agreement (yes/no) on suggested response scales</li> <li>- Suggestions/comments for modification or addition of items</li> </ul> |
|                                                                                                                                                                                                                          | <p><b>3<sup>rd</sup> round of consultation</b></p> <ul style="list-style-type: none"> <li>- Global and individual feedback report from round 2 (Level of consensus achieved, global and individual expert panel scores)</li> <li>- Consensus building on items by pillar and sub-pillar</li> <li>- Suggestions for practical recommendations by item to provide to clinicians to improve their AA practice</li> </ul>                                                                                                                                                                                                                                         |
| <p><b>Phase 3</b><br/> <b>Piloting, adjustment and development of a repository of recommendations</b></p>                                                                                                                | <ul style="list-style-type: none"> <li>- Questionnaire completion by PHC clinicians in different PHC settings</li> <li>- Psychometric properties analyses</li> </ul>                                                                                                                                                                                                                                                                                                                                                                                                                                                                                          |

## AA Reflective tool development

|                                                                        |                                                                                                                                                                                                                           |
|------------------------------------------------------------------------|---------------------------------------------------------------------------------------------------------------------------------------------------------------------------------------------------------------------------|
| To assess the tool and its applicability in different PHC environments | <ul style="list-style-type: none"> <li>- Focus groups to receive feedback and improvement tips</li> <li>- Final adjustments</li> <li>- Development of a repository of recommendations with actionable guidance</li> </ul> |
|------------------------------------------------------------------------|---------------------------------------------------------------------------------------------------------------------------------------------------------------------------------------------------------------------------|

**Study management**

The research team includes researchers with AA and methodological expertise, and PHC professionals including family physicians and nurses. The team will oversee the development and ongoing processes of the study, as well as major decisions regarding the selection of AA experts to invite to the face-to-face meeting (Phase 1) and to the e-Delphi consultation (Phase 2). They will also be involved in piloting material and instruments ahead of consultations.

**The expert panel**

To maximise the acceptability and usefulness of the reflective tool in Quebec's contemporary context, the research team will establish an AA expert panel comprised of provincial and local decision-makers, family physicians, practitioner and clinical nurses, continuous quality improvement officers, front desk, and administrative staff, as well as patients and researchers working in the field of AA. We will seek to bring together experts with diverse expertise based on their role in their own organization as well as at the local, regional or provincial level. Purposive and snowball sampling techniques will be used to identify eligible participants. Forty potential participants will first be approached and invited by the principal investigators by email to join the expert panel and to be part of the pre-Delphi meeting with the hope of recruiting and maintaining a sample of 20-25 experts across all 3 e-Delphi rounds. This is above the target of 10 to 18 individuals, to ensure the development of productive group dynamics and to maximize chances of reaching consensus among experts.[28] Participants will be considered for the panel if they are working in PHC or belong to an organization working closely with PHC professionals, and have an

## AA Reflective tool development

1  
2 extensive experience with AA (5 years+) as a practitioner or manager. Practitioners and managers  
3  
4 who were involved in the development of the training sessions provided by the Quebec College  
5  
6 of Family Physicians will also be invited. [32] Strategies to maximize the retention rate include  
7  
8 personalized reminders from one of the principal investigators, with the goal of not losing more  
9  
10 than 30% of the participants over the 3 expected rounds. [28,33]  
11  
12  
13

### Phase 1: Operationalization of the AA model

14  
15 Building a consensus around the AA model will first entail agreeing on the pillars and sub-pillars  
16  
17 that are essential to integrate in an AA practice in PHC. The starting point will be the conceptual  
18  
19 framework of the five guiding principles of AA developed by Murray and Berwick in 2003:[3] 1)  
20  
21 Balance supply and demand; 2) Reduce the backlog of previously scheduled appointments; 3)  
22  
23 Review the appointment system; 4) Integrate inter-professional practice; and 5) Develop  
24  
25 contingency plans (see Figure 1).  
26  
27  
28  
29

30  
31 Phase 1 will consist of a literature review to conceptualize a revised AA model. Search terms such  
32  
33 as “advanced access,” “open-access,” “same-day scheduling,” “timely access” and “AA  
34  
35 implementation” will be used. The literature review will include scientific studies and grey  
36  
37 literature reports at local, national, and international levels. This scan will allow us to delineate  
38  
39 the pillars and sub-pillars as defined in models of AA in the contemporary literature, as well as  
40  
41 constructs that need to be measured within each sub-pillar.  
42  
43

44  
45 Following revision by the research team, the revised AA model will be submitted to the AA expert  
46  
47 panel in a face-to-face meeting for discussions to build consensus while refining the pillars and  
48  
49 definitions. This in-person meeting will be highly interactive and use facilitation techniques for  
50  
51 group consultations, to encourage everyone’s participation. The meeting will be organized in two  
52  
53 steps. First, a variation of a “World Café” will be used to initiate and lead a collective reflection  
54  
55 around the AA pillars and definition identified by the research team. A World Café is a simple yet  
56  
57  
58  
59  
60

## AA Reflective tool development

1  
2 powerful method to enable meaningful conversations driven by participants and the topics that  
3 are relevant and important to them,[33,34] to lay the groundwork for common understandings.  
4  
5 Building on the results of the World Café, a “carousel brainstorming” technique will be used with  
6  
7 AA experts to brainstorm on important components to be included in each pillar. A Carousel  
8  
9 Activity is a communicative and interactive opportunity for participants to get up and move  
10  
11 around a room in a circular fashion, stopping intermittently to comment, discuss, or respond in  
12  
13 writing to probing headings/questions/topics/themes posted by a facilitator.[35] This technique  
14  
15 allows for small group discussion, followed by whole-group collective reflection.[36] Facilitation  
16  
17 techniques ensure that everyone is able to participate equally and is able to express his/her  
18  
19 viewpoint freely, while ignoring hierarchical concerns.[37] The results of this meeting will be  
20  
21 analyzed by the research team to come to a consensus on the conceptual model of AA including  
22  
23 the name, number of pillars, and definition of each identified pillar. This will serve as groundwork  
24  
25 for the e-Delphi consultation.  
26  
27  
28  
29  
30  
31

### **Phase 2: Creation of the AA reflective tool through e-Delphi consultation**

32  
33 Phase 2 will be conducted on an online survey tool (Survey Monkey platform). After each round,  
34  
35 a personalized report will be sent to each AA expert providing an overall view of responses as well  
36  
37 as their own, in an anonymized format. A list of processes to operationalize the various pillars and  
38  
39 sub-pillars developed during Phase 1 will be reviewed and adapted by the research team before  
40  
41 submission to the expert panel. The mandate of the panel will be to set the importance of the  
42  
43 suggested processes for each of the sub-pillars and to achieve a consensus on a final list of  
44  
45 processes, considered to be very important or essential for assessment of an AA practice. Experts  
46  
47 will also be surveyed regarding the adequacy of suggested response scales for each item of the  
48  
49 reflective AA tool.  
50  
51  
52  
53  
54  
55

### **Round 1**

## AA Reflective tool development

1  
2  
3 An individualized link to a personalized questionnaire will be sent to each AA expert. The first  
4  
5 round of consultation will propose sub-pillars that have emerged from Phase 1. For each of the  
6  
7 proposed sub-pillars, AA experts will be asked to rate their level of agreement (on a scale of 1 to  
8  
9 9) regarding the relevance of this sub-pillar to the concept of AA. The median as well as measures  
10  
11 of dispersion will be used as indicators of the level of consensus. There is no commonly defined  
12  
13 rule to determine achievement of consensus, so a pre-hoc decision was made to consider 75%  
14  
15 agreement to be consensus. Based on applied methods to determine consensus in a Delphi, [38,  
16  
17 39] we define the following three zones: a median between 7 and 9 indicates high relevance, a  
18  
19 median between 1 and 3 indicates low relevance, and a middle zone relevance of a median  
20  
21 between 4 and 6 where the relevance is uncertain. These sub-pillars will be retained for a second  
22  
23 round of consultation. A 9-point evaluation scale was chosen for this phase to allow participants  
24  
25 to express their perception of relevance of a sub-pillar using a wide range of possibilities. Experts  
26  
27 will also be asked to provide their definition, to comment on the sub-pillar, to indicate if this sub-  
28  
29 pillar is associated with the appropriate pillar, and to add any sub-pillars they think are missing  
30  
31 along with suggested definitions.  
32  
33  
34  
35  
36

### Round 2 and 3 surveys

37  
38  
39 A feedback report from the previous round will accompany each new round of questionnaires,  
40  
41 including the level of consensus achieved along with global and individual relevance scores for  
42  
43 each item. In rounds 2 and 3 (and further if needed) the importance of the suggested items will  
44  
45 be rated using 5-point Likert scale. The specification of each element of the response scale (1=Not  
46  
47 important at all, 2=Little important, 3=Somewhat important, 4=Very important and 5=Essential)  
48  
49 is intended to simplify the respondents' burden of response while adding clarity to the responses  
50  
51 obtained. Consensus will be attained if 75% of respondents rate an item "Very important" or  
52  
53 "Essential." More specifically, consensus will be reached with a median rating of 4 or more, with  
54  
55  
56  
57  
58  
59  
60

## AA Reflective tool development

1  
2 an interquartile range (IQR) of less than 1. If an item is rated below 4 by more than 25% of  
3  
4 respondents, this be interpreted to be non-consensus. AA experts will be given the opportunity  
5  
6 to modify their initial response in light of the answers provided from the group, so as to facilitate  
7  
8 the group evolution towards consensus. [31,40] They will also be asked to score new propositions  
9  
10 and modifications emerging from the previous round. The process will continue with further  
11  
12 rounds until a consensus on the importance of each item is reached - or not.[31,40] The e-Delphi  
13  
14 rounds will cease when an acceptable degree of consensus is reached.[41,42] Particular attention  
15  
16 will be given following each round to assess whether consensus has been reached over a  
17  
18 particular round, or rather evolved throughout the process, and whether the group's opinion has  
19  
20 changed over the rounds.[43] Phase 2 will result in the creation of the online reflective tool based  
21  
22 on the list of items for which consensus was achieved, to rigorously assess the processes required  
23  
24 in an AA practice.  
25  
26  
27  
28  
29

### **Phase 3: Assessment and applicability of the newly developed AA reflective tool and development of a repository of recommendations**

30  
31  
32  
33  
34  
35  
36 A sub-group of 5 to 10 AA experts who participated in phases 1 and/or 2 will be consulted to  
37  
38 formulate and prioritize recommendations for an optimal AA practice.  
39  
40

#### **AA reflective tool refinement**

41  
42  
43 Survey completion sessions will be organized with PHC professionals and staff from five different  
44  
45 PHC clinics, who will not have been involved in the previous phases of the study. These survey  
46  
47 completion sessions will include feedback discussions on the completion of the tool, and will be  
48  
49 led by the research team. Following cognitive testing techniques[44], these sessions are intended  
50  
51 to identify items that are not clear or need to be reformulated, as well as any difficulties  
52  
53 encountered during completion of the questionnaire. Following this piloting and development  
54  
55  
56  
57  
58  
59  
60



## AA Reflective tool development

1  
2  
3 period, the AA reflective tool will be considered to be final, and ready to be evaluated by a larger  
4  
5 number of potential users.  
6  
7

### **Development of a repository of recommendations**

8  
9  
10 A repository of recommendations aligned with the different components of the revised AA model  
11  
12 will be created, in relation to the result obtained after the completion of the tool. This repository  
13  
14 of recommendations will be made available through the electronic platform, upon completion of  
15  
16 the evaluation using the AA reflective tool. Recommendations will be personalized according to  
17  
18 the professional “portrait” based on their score on each pillar, providing them with actionable  
19  
20 avenues. Such an approach was inspired by the primary care quality improvement tool of the  
21  
22 College of Family Physicians of Canada.[25]  
23  
24

25  
26 The repository of recommendations will be inspired by systematic collation of best practices, by  
27  
28 reviewing the literature related to each of the components of AA (e.g., improving interprofessional  
29  
30 collaboration, optimization of telephone reception, managing escalation of emergencies) and  
31  
32 using feedback generated by the expert panel on the final e-Delphi round. Implementation guides  
33  
34 as well as locally developed help-tools will serve as sources of recommendations for the repository  
35  
36 and will be expanded with experiences of AA experts and their close collaborators. The repository  
37  
38 will be expanded and refined during the third round of the e-Delphi and during the survey  
39  
40 completion sessions. If discussion of recommendations cannot be addressed in the 3<sup>rd</sup> round of  
41  
42 the e-Delphi, we will bring the discussion to experts in an additional face-to-face or virtual  
43  
44 meeting.”  
45  
46  
47  
48  
49

### **Assessing the psychometric properties of the Reflective tool**

50  
51  
52 The final step of development of the tool will consist of the evaluation of some of its psychometric  
53  
54 properties. To do so, we plan to recruit a minimum of 150 to 200 PHC professionals in at least 10  
55  
56  
57  
58  
59  
60

## AA Reflective tool development

1  
2  
3 PHC clinics that have not been involved in the development of the tool.[45] The family physicians,  
4  
5 nurses and other professionals working in those PHC clinics will be asked to complete the newly  
6  
7 developed tool and comment on its content. Following qualitative feedback, the first analysis will  
8  
9 be at the item level: after excluding items with more than 4% missing values, we will do an item  
10  
11 discrimination analysis to learn how well an item can discriminate between high and low AA  
12  
13 performers. Items with a lack of variation in responses – i.e., that are either too easy to or too  
14  
15 difficult to attain – will be reviewed for content and adequacy of the response scale. Other  
16  
17 properties tested will be the tool's reliability (repeatability, and intra- and inter-reliability in  
18  
19 different contexts or between different types of healthcare professionals), and validity (construct  
20  
21 validity with a confirmatory factor analysis). Finally, internal consistency will be analyzed for each  
22  
23 pillar and sub-pillar.  
24  
25  
26  
27

## **Patient and public involvement**

28  
29  
30  
31 At least two patients will be invited to the face-to-face meeting in phase 1 as well as the  
32  
33 e-Delphi survey. We also intend to consult the patient partners' group related to our research  
34  
35 infrastructure at the end of the tool development to discuss issues that may have arisen and  
36  
37 could require a patient point of view. This group is composed of 5 patients partners involved in  
38  
39 different research project on AA.  
40  
41  
42  
43

## **Ethics and dissemination**

44  
45  
46 Ethics and consent for participation will be sought at each phase of the study. Participation in a  
47  
48 meeting or completion of an electronic survey will be considered to be consent for participation  
49  
50 and use of anonymized data; as in focus groups or individual interviews, a written consent will be  
51  
52 sought.  
53

54  
55 The results dissemination plan includes communications through the PHC community including  
56  
57  
58  
59  
60

## AA Reflective tool development

1  
2 our partner organizations, and to the scientific community via the peer-reviewed literature and  
3  
4 conferences. We will attempt to reach many PHC professionals to let them know of our findings  
5  
6 through professional organisations and by organising a symposium that will bring together our  
7  
8 expert participants as well as colleagues from their organisations or from other organisations and  
9  
10 PHC clinics. As so, elements and lessons learned from this study will be shared through multiple  
11  
12 community media resources, including presentations and webinars, newsletters, and a  
13  
14 symposium on AA initiated by the research team.  
15  
16  
17  
18  
19

## 20 DISCUSSION

21  
22  
23 Scientific articles on the foundations of AA have been published over the past 20 years. During  
24  
25 this time interdisciplinary collaborative practice has evolved within PHC family practices, with  
26  
27 several healthcare professionals now being part of the PHC team. This study will help to redefine  
28  
29 the foundations of the AA model by integrating an interdisciplinary team-based focus, while  
30  
31 considering changes that have been put in place in PHC practices. The inclusion of various PHC  
32  
33 stakeholders in the tool development process will allow the tool and its content to reflect realities  
34  
35 experienced in the field. Participation of AA champions in the overall development process of the  
36  
37 AA reflective tool will benefit the community's acceptance of the tool.  
38  
39

40  
41 This study will provide a rigorously developed up-to-date AA reflective tool based on the literature  
42  
43 and on the experiences of various PHC stakeholders, while providing a response to their expressed  
44  
45 needs for a reflective tool. The newly developed reflective tool will be helpful as the Ministry of  
46  
47 Health and Social Services and professional medical organisations are currently promoting AA in  
48  
49 PHC settings and other professional associations across Canada. Timely access is a key pillar of  
50  
51 PCMH, a well-known model to guide the developed of PHC around the world. The reflective tool  
52  
53 on AA developed in this study will be available for use and adaptation in different countries.  
54  
55  
56  
57  
58  
59  
60

## AA Reflective tool development

1  
2  
3 The repository of recommendations developed in parallel with the tool will provide the AA tool  
4 users with advice in relation with their own AA evaluation, and provide pragmatic and  
5 personalized recommendations to improve their AA practice. This will all be conveniently  
6 available online.  
7  
8  
9  
10

## 11 12 13 14 15 **List of abbreviations**

16  
17  
18 AA: Advanced access

19  
20 PHC: Primary healthcare

21  
22 PCMH: Patient-centered medical home

23  
24 IQR: Interquartile range  
25  
26  
27

## 28 29 **Figures**

30  
31 Figure 1. The five pillars of advanced access. The figure shows the Advanced access model  
32 with the original five pillars and guiding principles. This is used as a starting point for this  
33 proposal.  
34  
35  
36  
37  
38  
39  
40  
41  
42

## 43 44 45 46 **DECLARATIONS**

### 47 **Ethics approval and consent to participate**

48  
49 The protocol for this study has been reviewed and approved by the Scientific Research Committee  
50 and ethics provided by the Research Ethics Board of the Centre Intégré de Santé et de Services  
51 Sociaux de la Montérégie-Centre (CISSS MC) (2020-441, CP 980475).  
52  
53  
54  
55  
56  
57  
58  
59  
60

AA Reflective tool development

### **Consent for publication**

Not applicable

### **Availability of data and material**

Not applicable

### **Authors' contributions**

MB and IG led the conceptualization and design of the study, but all authors were involved. MB, IG and CB will lead the coordination of the study. MB, IG and CB wrote the first draft and MS, SAM, CH, IR, LM, AD, NDS and JH critically reviewed it and provided comments to improve the first draft and the revised version of the manuscript. All authors (MB, IG, CB, MS, SAM, CH, IR, LM, AD, NDS and JH) read and approved the final version.

### **Competing interests**

The authors declare that they have no competing interests.

### **Funding**

This study received a two years funding from the Ministry of Health and Social Services of Quebec (MSSS) of \$500 000. The funding organization was not involved in the design of the study nor writing of the protocol (980475).

### **Acknowledgements**

The authors thank Meg Sears for scientific and linguistic editing.

## AA Reflective tool development

## REFERENCES

- 1 Ansell D, Crispo JAG, Simard B, *et al.* Interventions to reduce wait times for primary care appointments: a systematic review. *BMC Health Serv Res* 2017;**17**:295. doi:10.1186/s12913-017-2219-y
- 2 Collège des médecins de famille du Canada. Une vision pour le Canada. La pratique de la médecine familiale : Le centre de médecine de famille. Mississauga, ON. 2011. [https://www.google.com/url?sa=t&rct=j&q=&esrc=s&source=web&cd=&cad=rja&uact=8&ved=2ahUKEwjyqbO75rjqAhU1YTUKHSQPDncQFjACegQIAxAB&url=https%3A%2F%2Fwww.cfpc.ca%2FuploadedFiles%2FAbout\\_Us%2FFM-Professional-Profile-FR.pdf&usg=AOvVaw3wJlJ3K5ttqlxdotLSRz5L](https://www.google.com/url?sa=t&rct=j&q=&esrc=s&source=web&cd=&cad=rja&uact=8&ved=2ahUKEwjyqbO75rjqAhU1YTUKHSQPDncQFjACegQIAxAB&url=https%3A%2F%2Fwww.cfpc.ca%2FuploadedFiles%2FAbout_Us%2FFM-Professional-Profile-FR.pdf&usg=AOvVaw3wJlJ3K5ttqlxdotLSRz5L)
- 3 Murray M, Berwick DM. Advanced access: reducing waiting and delays in primary care. *JAMA* 2003;**289**:1035–40.
- 4 Abou Malham S, Touati N, Maillet L, *et al.* What Are the Factors Influencing Implementation of Advanced Access in Family Medicine Units? A Cross-Case Comparison of Four Early Adopters in Quebec. *Int J Fam Med* 2017;**2017**:1–15. doi:10.1155/2017/1595406
- 5 Bundy DG, Randolph GD, Murray M, *et al.* Open access in primary care: results of a North Carolina pilot project. *Pediatrics* 2005;**116**:82–7.
- 6 Rose KD, Ross JS, Horwitz LI. Advanced access scheduling outcomes: a systematic review. *Arch Intern Med* 2011;**171**:1150–9. doi:10.1001/archinternmed.2011.168
- 7 Fournier J, Heale R, Rietze LL. I can't wait: advanced access decreases wait times in primary healthcare. *Healthc Q Tor Ont* 2012;**15**:64–8.
- 8 Hudec JC, MacDougall S, Rankin E. Advanced access appointments: Effects on family physician satisfaction, physicians' office income, and emergency department use. *Can Fam Physician Med Fam Can* 2010;**56**:e361–7.
- 9 Rivas J. Advanced Access Scheduling in Primary Care: A Synthesis of Evidence. *J Healthc Manag* 2020;**65**:171–84. doi:10.1097/JHM-D-19-00047
- 10 Belardi FG, Weir S, Craig FW. A controlled trial of an advanced access appointment system in a residency family medicine center. *Fam Med* 2004;**36**:341–5.
- 11 Bennett CC. A healthier future for all Australians: an overview of the final report of the National Health and Hospitals Reform Commission. *Med J Aust* 2009;**191**:383–7.
- 12 Ahluwalia S, Offredy M. A qualitative study of the impact of the implementation of advanced access in primary healthcare on the working lives of general practice staff. *BMC Fam Pract* 2005;**6**:39.
- 13 College of Family Physicians of Canada. Best Advice- Timely Access to Appointments in Family Practice. 2012. [https://portal.cfpc.ca/ResourcesDocs/uploadedFiles/Health\\_Policy/\\_PDFs/2012\\_Final\\_Best\\_Advice\\_Enhancing\\_Timely\\_Access.pdf](https://portal.cfpc.ca/ResourcesDocs/uploadedFiles/Health_Policy/_PDFs/2012_Final_Best_Advice_Enhancing_Timely_Access.pdf)

## AA Reflective tool development

- 1  
2  
3 14 Lemire F. Refreshing the Patient's Medical Home: New vision for providing exceptional care  
4 in family practice. *Can Fam Physician Med Fam Can* 2019;**65**:152.
- 5  
6 15 Breton M, Maillet L, Paré I, *et al.* Perceptions of the first family physicians to adopt  
7 advanced access in the province of Quebec, Canada. *Int J Health Plann Manage*  
8 2017;**32**:e316–32. doi:10.1002/hpm.2380  
9
- 10 16 Brazeau S, Couture P, Karemere-Bimana H, *et al.* *Guide pour l'implantation de l'accès*  
11 *adapté: l'expérience d'une région : Laval*. Laval: : Centre intégré de santé et de services  
12 sociaux de Laval 2016.  
13 <http://www.santecom.qc.ca/Bibliothequevirtuelle/Laval/9782550744337.pdf> (accessed 17  
14 Jul 2020).  
15
- 16 17 Centre intégré de santé et de services sociaux du Bas Saint-Laurent. Outils, Zone  
17 professionnelle, Accès Adapté. 2020.[https://www.cisss-bsl.gouv.qc.ca/zone-](https://www.cisss-bsl.gouv.qc.ca/zone-professionnelle/acces-adapte/outils)  
18 [professionnelle/acces-adapte/outils](https://www.cisss-bsl.gouv.qc.ca/zone-professionnelle/acces-adapte/outils) (accessed 12 Aug 2020).  
19  
20
- 21 18 Health Quality Ontario. Quality Improvement e-Learning Modules: Timely Access to Primary  
22 Care. [hqontario.ca](http://hqontario.ca). [https://www.hqontario.ca/Quality-Improvement/E-Learning-and-](https://www.hqontario.ca/Quality-Improvement/E-Learning-and-Events/E-Learning-Modules-Timely-Access-to-Primary-Care)  
23 [Events/E-Learning-Modules-Timely-Access-to-Primary-Care](https://www.hqontario.ca/Quality-Improvement/E-Learning-and-Events/E-Learning-Modules-Timely-Access-to-Primary-Care) (accessed 12 Aug 2020).  
24
- 25 19 Institute of Medicine (U.S.), Kaplan G, Lopez MH, *et al.*, editors. *Transforming health care*  
26 *scheduling and access: getting to now*. Washington, D.C: : The National Academies Press  
27 2015.  
28
- 29 20 Lukas C, Meterko M, Mohr D, Marjorie, Seibert N. The implementation and effectiveness of  
30 advanced clinic access.  
31 2004.[https://www.researchgate.net/publication/228478818\\_The\\_Implementation\\_and\\_Eff](https://www.researchgate.net/publication/228478818_The_Implementation_and_Effectiveness_of_Advanced_Clinic_Access/citation/download)  
32 [ectiveness\\_of\\_Advanced\\_Clinic\\_Access/citation/download](https://www.researchgate.net/publication/228478818_The_Implementation_and_Effectiveness_of_Advanced_Clinic_Access/citation/download)  
33  
34
- 35 21 Institute for Health Improvement. Primary Care Access.  
36 <http://www.ihl.org/Topics/PrimaryCareAccess/Pages/default.aspx> (accessed 12 Aug 2020).  
37
- 38 22 Practice Management Network. Improving acces, responding to patients. A 'how-to' guide  
39 for GP practices. 2009.<https://www.choiceforum.org/docs/gpguide.pdf> (accessed 12 Aug  
40 2020).  
41  
42
- 43 23 Langley GJ, editor. *The improvement guide: a practical approach to enhancing*  
44 *organizational performance*. 2nd ed. San Francisco: : Jossey-Bass 2009.  
45
- 46 24 Stenov V, Wind G, Skinner T, *et al.* The potential of a self-assessment tool to identify  
47 healthcare professionals' strengths and areas in need of professional development to aid  
48 effective facilitation of group-based, person-centered diabetes education. *BMC Med Educ*  
49 2017;**17**:166. doi:10.1186/s12909-017-1003-3  
50
- 51 25 The College of Family Physicians of Canada. The self-assessment tool for the Patient's  
52 Medical Home. 2018.<https://patientsmedicalhome.ca/self-assess/> (accessed 12 Aug 2020).  
53  
54
- 55 26 The Joint Learning Network for Universal Health Coverage. UHC Primary Health Care Self-  
56 Assessment Tool. 2015.  
57  
58  
59  
60

## AA Reflective tool development

- 1  
2  
3 27 The American Medical Association. The Caregiver Self-Assessment Tool. Heal. Trust. Inf.  
4 Better Care. 2015.[https://www.healthinaging.org/tools-and-tips/caregiver-self-assessment-](https://www.healthinaging.org/tools-and-tips/caregiver-self-assessment-questionnaire)  
5 questionnaire (accessed 17 Aug 2020).  
6  
7 28 Veugelers R, Gaakeer MI, Patka P, *et al.* Improving design choices in Delphi studies in  
8 medicine: the case of an exemplary physician multi-round panel study with 100% response.  
9 *BMC Med Res Methodol* 2020;**20**:156. doi:10.1186/s12874-020-01029-4  
10  
11 29 Jünger S, Payne SA, Brine J, *et al.* Guidance on Conducting and REporting DELphi Studies  
12 (CREDES) in palliative care: Recommendations based on a methodological systematic  
13 review. *Palliat Med* 2017;**31**:684–706. doi:10.1177/0269216317690685  
14  
15 30 Falzarano M, Pinto G. Seeking Consensus Through the Use of the Delphi Technique in Health  
16 Sciences Research. *J Allied Health* 2013;**42**:99–105.  
17  
18 31 Hsu C-C, Sandford BA. The Delphi Technique: Making Sense of Consensus. *Pract Assess Res*  
19 *Eval* 2007;**12**:1–6. doi:10.7275/PDZ9-TH90  
20  
21 32 Accès adapté, organisation de la pratique: L'accès adapté en un clic ! Fédération Médecins  
22 Omnipraticiens Qué. 2015.[https://www.fmoq.org/pratique/organisation-de-la-](https://www.fmoq.org/pratique/organisation-de-la-pratique/acces-adapte/)  
23 pratique/acces-adapte/ (accessed 12 Aug 2020).  
24  
25 33 Hyper Island. SessionLab. <https://www.sessionlab.com/methods/world-cafe> (accessed 12  
26 Aug 2020).  
27  
28 34 The world cafe. 2020.[http://www.theworldcafe.com/key-concepts-resources/world-cafe-](http://www.theworldcafe.com/key-concepts-resources/world-cafe-method/)  
29 method/ (accessed 12 Aug 2020).  
30  
31 35 Delgado RA. Carousel activity protocol. Utica Coll.  
32 2020.[https://www.uticaschools.org/site/handlers/filedownload.ashx?moduleinstanceid=%2](https://www.uticaschools.org/site/handlers/filedownload.ashx?moduleinstanceid=%20273&dataid=286&FileName=Carousel%20Activity%20Protocol.pdf)  
33 0273&dataid=286&FileName=Carousel%20Activity%20Protocol.pdf (accessed 12 Aug 2020).  
34  
35 36 Simon CA. Strategy Guide: Brainstorming and Reviewing Using the Carousel Strategy.  
36 ReadWriteThink. 2020.[http://www.readwritethink.org/professional-development/strategy-](http://www.readwritethink.org/professional-development/strategy-guides/brainstorming-reviewing-using-carousel-30630.html)  
37 guides/brainstorming-reviewing-using-carousel-30630.html (accessed 12 Aug 2020).  
38  
39 37 Liberating structures. 2020.<http://www.liberatingstructures.com/> (accessed 12 Aug 2020).  
40  
41 38 K Fitch, SJ Bernstein, MD Aguilar, B Burnand, JR LaCalle, P Lazaro, MVH Loo, J McDonnell, JP  
42 Vader, JP Kahan. The RAND/UCLA Appropriateness Method Users' Manual.  
43 2001.<https://apps.dtic.mil/dtic/tr/fulltext/u2/a393235.pdf>  
44  
45 39 Dionne CE, Tremblay-Boudreault V. L'approche Delphi. Application dans la conception d'un  
46 outil clinique en réadaptation au travail en santé mentale. In: *Méthodes qualitatives,*  
47 *quantitatives et mixtes, 2e édition.* 2000.  
48  
49 40 Hsu C-C, Sandford B. Minimizing Non-Response in The Delphi Process: How to Respond to  
50 Non-Response. *Pract Assess Res Eval* 2007;**12**. doi:<https://doi.org/10.7275/by88-4025>  
51  
52 41 J. Skulmoski G, T. Hartman F, Krahn J. The Delphi Method for Graduate Research. *J Inf*



## AA Reflective tool development

1  
2  
3           *Technol Educ Res* 2007;**6**:001–21. doi:10.28945/199

4  
5       42 de Villiers MR, de Villiers PJT, Kent AP. The Delphi technique in health sciences education  
6           research. *Med Teach* 2005;**27**:639–43.

7  
8       43 Holey EA, Feeley JL, Dixon J, *et al*. An exploration of the use of simple statistics to measure  
9           consensus and stability in Delphi studies. *BMC Med Res Methodol* 2007;**7**:52.

10  
11       44 Willis GB. *Analysis of the cognitive interview in questionnaire design*. Oxford: : Oxford  
12           University Press 2015.

13  
14       45 Martin CR; Hollins Martin CJ. Minimum sample size requirements for a validation study of  
15           the birth satisfaction scale-revised (BSS-R). *J Nurs Pract* 2017;**1**:25–30.  
16  
17  
18  
19  
20  
21  
22  
23  
24  
25  
26  
27  
28  
29  
30  
31  
32  
33  
34  
35  
36  
37  
38  
39  
40  
41  
42  
43  
44  
45  
46  
47  
48  
49  
50  
51  
52  
53  
54  
55  
56  
57  
58  
59  
60

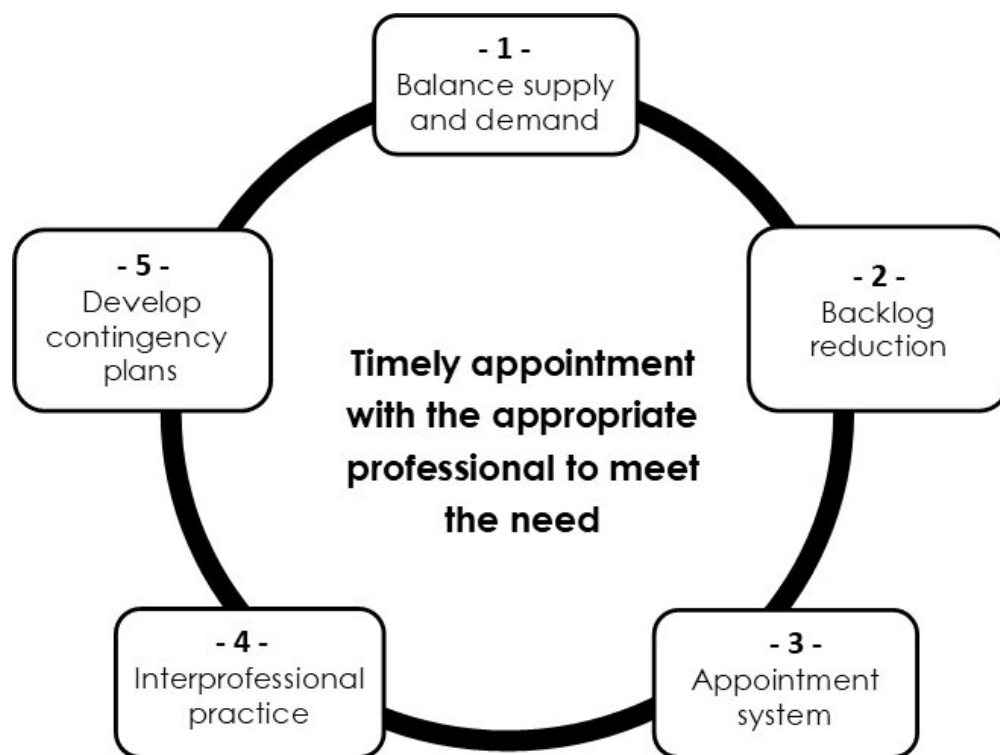

Figure 1. The five pillars of advanced access. The figure shows the Advanced Access model with the original five pillars and guiding principles. This is used as a starting point for this proposal.access initial development.

174x139mm (96 x 96 DPI)

# BMJ Open

## Development of a self-reported reflective tool on advanced access to support primary healthcare providers: Study protocol of a mixed method research design using an e-Delphi survey

|                                 |                                                                                                                                                                                                                                                                                                                                                                                                                                                                                                                                                                                                                                                                                                                                                                                                                                                                                                                                                                         |
|---------------------------------|-------------------------------------------------------------------------------------------------------------------------------------------------------------------------------------------------------------------------------------------------------------------------------------------------------------------------------------------------------------------------------------------------------------------------------------------------------------------------------------------------------------------------------------------------------------------------------------------------------------------------------------------------------------------------------------------------------------------------------------------------------------------------------------------------------------------------------------------------------------------------------------------------------------------------------------------------------------------------|
| Journal:                        | <i>BMJ Open</i>                                                                                                                                                                                                                                                                                                                                                                                                                                                                                                                                                                                                                                                                                                                                                                                                                                                                                                                                                         |
| Manuscript ID                   | bmjopen-2020-046411.R2                                                                                                                                                                                                                                                                                                                                                                                                                                                                                                                                                                                                                                                                                                                                                                                                                                                                                                                                                  |
| Article Type:                   | Protocol                                                                                                                                                                                                                                                                                                                                                                                                                                                                                                                                                                                                                                                                                                                                                                                                                                                                                                                                                                |
| Date Submitted by the Author:   | 04-Oct-2021                                                                                                                                                                                                                                                                                                                                                                                                                                                                                                                                                                                                                                                                                                                                                                                                                                                                                                                                                             |
| Complete List of Authors:       | Breton, Mylaine; University of Sherbrooke, Faculty of Medicine and Health Sciences, Department of Community Health<br>Gaboury, Isabelle; Université de Sherbrooke Faculté de médecine et des sciences de la santé, Department of Family Medicine and Emergency Medicine<br>Sasseville, Maxime; Université Laval, Nursing faculty<br>Beaulieu, Christine; University of Sherbrooke, Faculty of Medicine and Health Sciences<br>Abou Malham, Sabina; University of Sherbrooke, School of Nursing Sciences<br>Hudon, catherine; Université de Sherbrooke, Faculty of Medicine and Health Sciences<br>Rodrigues, Isabel; Université de Montréal Faculté de Médecine<br>Maillet, Lara; Université du Québec à Montréal, École nationale d'administration publique - ENAP<br>Duhoux, Arnaud; Université de Montréal<br>Deville-Stoetzel, Nadia; University of Sherbrooke, Faculty of Medicine and Health Sciences<br>Haggerty, Jeannie; McGill University Faculty of Medicine |
| <b>Primary Subject Heading</b>: | General practice / Family practice                                                                                                                                                                                                                                                                                                                                                                                                                                                                                                                                                                                                                                                                                                                                                                                                                                                                                                                                      |
| Secondary Subject Heading:      | Health services research                                                                                                                                                                                                                                                                                                                                                                                                                                                                                                                                                                                                                                                                                                                                                                                                                                                                                                                                                |
| Keywords:                       | PRIMARY CARE, Organisation of health services < HEALTH SERVICES ADMINISTRATION & MANAGEMENT, Quality in health care < HEALTH SERVICES ADMINISTRATION & MANAGEMENT                                                                                                                                                                                                                                                                                                                                                                                                                                                                                                                                                                                                                                                                                                                                                                                                       |
|                                 |                                                                                                                                                                                                                                                                                                                                                                                                                                                                                                                                                                                                                                                                                                                                                                                                                                                                                                                                                                         |

SCHOLARONE™  
Manuscripts



I, the Submitting Author has the right to grant and does grant on behalf of all authors of the Work (as defined in the below author licence), an exclusive licence and/or a non-exclusive licence for contributions from authors who are: i) UK Crown employees; ii) where BMJ has agreed a CC-BY licence shall apply, and/or iii) in accordance with the terms applicable for US Federal Government officers or employees acting as part of their official duties; on a worldwide, perpetual, irrevocable, royalty-free basis to BMJ Publishing Group Ltd ("BMJ") its licensees and where the relevant Journal is co-owned by BMJ to the co-owners of the Journal, to publish the Work in this journal and any other BMJ products and to exploit all rights, as set out in our [licence](#).

The Submitting Author accepts and understands that any supply made under these terms is made by BMJ to the Submitting Author unless you are acting as an employee on behalf of your employer or a postgraduate student of an affiliated institution which is paying any applicable article publishing charge ("APC") for Open Access articles. Where the Submitting Author wishes to make the Work available on an Open Access basis (and intends to pay the relevant APC), the terms of reuse of such Open Access shall be governed by a Creative Commons licence – details of these licences and which [Creative Commons](#) licence will apply to this Work are set out in our licence referred to above.

Other than as permitted in any relevant BMJ Author's Self Archiving Policies, I confirm this Work has not been accepted for publication elsewhere, is not being considered for publication elsewhere and does not duplicate material already published. I confirm all authors consent to publication of this Work and authorise the granting of this licence.

AA Reflective tool development

# Development of a self-reported reflective tool on advanced access to support primary healthcare providers: Study protocol of a mixed method research design using an e-Delphi survey

## AUTHORS

Mylaine Breton<sup>1\*</sup>, Isabelle Gaboury<sup>1</sup>, Maxime Sasseville<sup>2</sup>, Christine Beaulieu<sup>1</sup> Sabina Abou Malham<sup>1</sup>, Catherine Hudon<sup>1,3</sup>, Isabel Rodrigues<sup>4</sup>, Lara Maillet<sup>5</sup>, Arnaud Duhoux<sup>6</sup> Nadia Deville-Stoetzel<sup>1</sup>, Jeannie Haggerty<sup>7</sup>

## AUTHORS AFFILIATIONS

1 Faculty of Medicine and Health Sciences, Université de Sherbrooke, Longueuil, QC J4K 0A8, Canada.

2 Faculty of Nursing, Université Laval, Québec, QC, G1J 0A4, Canada.

3 Centre de recherche du CHUS, Sherbrooke, QC J1H 5N4, Canada

4 Faculty of Medicine, Université de Montréal, Montréal, QC H3C 3J7, Canada

5 École Nationale d'Administration Publique, Montréal, QC G1K 9E5, Canada

6 Faculty of Nursing, Université de Montréal, Montréal, QC H3C 3J7, Canada

7 Faculty of Medicine, McGill University, Montréal, QC H3G 2M1, Canada

## CORRESPONDING AUTHOR

Mylaine Breton, MBA, Ph.D.

Associate professor - Université de Sherbrooke - Campus Longueuil

Canada Research Chair - Clinical Governance in Primary Health Care (Tier 2)

## AA Reflective tool development

150 Place Charles-Le Moyne, Office 200, Longueuil, Canada, J4K0A8

Phone: 514-216-4033 (Canada), 857-654-3748 (US)

Email: [mylaine.breton@usherbrooke.ca](mailto:mylaine.breton@usherbrooke.ca)

**WORD COUNT:** 3720

## ABSTRACT

### Introduction

Timely access is one of the cornerstones of strong primary healthcare (PHC). New models to increase timely access have emerged across the world, including advanced access (AA). Recently in Quebec, Canada, the AA model has spread widely across the province. The model has largely been implemented by PHC professionals with important variations; however, a tool to assess their practice improvement within AA is lacking. The general objective of this study is to develop a self-reported online reflective tool that will guide PHC professionals' reflection on their individual AA practice and formulation of recommendations for improvement. Specific objectives are: 1) Operationalization of the pillars and sub-pillars of AA; 2) Development of a self-reported questionnaire; and 3) Evaluation of the psychometrics.

### Methods and analysis

The pillars composing Murray's model of AA will first be reviewed in collaboration with PHC professional and stakeholders, patients, and researchers in a face-to-face meeting, with the goal to establish consensus on the pillars and sub-pillars of AA. Leading from these definitions, items will be identified for evaluation through an e-Delphi consultation. Three rounds are planned in 2020-21 with a group of 20-25 experts. A repository of recommendations on how to improve one's AA practice will be populated based on the literature and enriched by our experts

## AA Reflective tool development

1  
2 throughout the consultation. Median and measures of dispersions will be used to evaluate  
3  
4 agreement. The resulting tool will then be evaluated by PHC professionals for psychometrics in  
5  
6 2021-22.  
7  
8  
9

## 10 **Ethics and dissemination**

11  
12 The Centre Intégré de Santé et de Services Sociaux de la Montérégie-Centre Scientific Research  
13  
14 Committee approved the protocol, and the Research Ethics Board provided ethics approval (2020-  
15  
16 441, CP 980475). Dissemination plan is a mix of community diffusion through and for our partners  
17  
18 and to the scientific community including peer-reviewed publications and conference  
19  
20 presentations.  
21  
22  
23  
24  
25

26 **Keywords:** Advanced Access, Reflective tool, Primary healthcare, Timely access, Self-reported,  
27  
28 Delphi consultation  
29  
30

## 31 **STRENGTHS AND LIMITATIONS OF THIS STUDY**

- 32  
33  
34 • Provides a revisited and operationalization of the pillars and sub-pillars of the advanced access  
35  
36 model developed 25 years ago.
- 37  
38 • Provides a rigorously-developed up-to-date tool on advanced access based on the literature and  
39  
40 on the experiences of various primary healthcare stakeholders in response to their expressed  
41  
42 needs.
- 43  
44 • Involves the participation of multiple stakeholders with different roles and attached to diverse  
45  
46 organisation originating from multiple environments including urban, rural and remote regions.
- 47  
48 • The Delphi method allows the experts to express their thoughts independently, while  
49  
50 encouraging pragmatism, honesty and creativity.
- 51  
52 • The developed tool may not be transferable without cultural adaptation to other settings where  
53  
54 the principles of AA are implemented.  
55  
56  
57  
58  
59  
60

## AA Reflective tool development

## INTRODUCTION

## Advanced Access model

Timely access is widely recognized as a cornerstone of effective primary healthcare (PHC). The Advanced Access (AA) model, developed to increase timely access, has been promoted and adopted in primary care settings in various countries. It is the most commonly used organizational model to reduce wait times for primary care appointments.[1] Timely access is one of the guiding principles of the Patient-centered Medical Home (PCMH).[2] The pillars of AA complement the PCMH model (timely access, comprehensiveness, continuity, interprofessional collaboration) and emphasize organizational components. AA has been defined according to five pillars:[3,4] 1) Balance supply and demand; 2) Reduce the backlog of previously scheduled appointments; 3) Review the appointment system; 4) Integrate inter-professional practice; and 5) Develop contingency plans (see Figure 1). The AA model was developed in the United States in 2001 and implemented in North America and Europe, with many studies in the USA, the United Kingdom and Canada and its effectiveness demonstrated in various healthcare systems.[5–9] Benefits of AA include reduced wait times,[5,6,9–11] fewer missed appointments,[5,10] and improved professional and [8,12] patient satisfaction,[5] and provider productivity.[9]

The AA model aligns with the organizational guiding principles for a high-quality-high-performance primary care organization as put forward by the College of Family Physicians of Canada.[13,14] That said, even if the concept of AA developed more than 20 years ago by Murray et al. remains current, it needs to be adapted to the contemporary context.[15] This study contributes to refine AA based on more interdisciplinary-based team and the need to improve PHC practice with a quality improvement approach.

Please insert figure 1 here



## AA Reflective tool development

### Evolution of AA and state of research in the province of Quebec

In Quebec, AA was first introduced in 2012, and since then it has been widely promoted by the Quebec College of Family Physicians, as well as by the Ministry of Health and Social Services.[16,17] Family physicians are strongly encouraged to implement an AA model based on the five pillars proposed by Murray et al.[3] Over the past six years, the majority of PHC family physicians in Quebec have introduced AA in their organizations at varying levels of implementation. [4,18]

### An expressed need for a reflective tool

Several guides have been developed in Canada,[18–20] the United States[21–23] and Europe[24] to assist PHC professionals and/or organizations to plan and implement AA. These guides offer recommendations to plan supply, reduce demand, and organize appointment management in order to achieve and maintain a balance between supply and demand, thus enabling timely responses to patient requests. The guides generally present principles of AA, along with how to implement initial changes and some measurement tools. They also offer strategies to support the introduction of AA, but lack information and guidance to improve and sustain AA or to troubleshoot issues over time.

There is no tool even to evaluate the status of AA in a professional's practice, let alone to guide its continuous improvement and sustainability. Inspired by the principles of the Model for Improvement, [25] such a tool could be used to align metrics across multiple PHC providers, while operationalizing the complex process of providing access to care in a daily practice. One could use the developed tool to reflect upon one's practice and plan for modifications to improve patient access. This project was therefore developed in response to a clearly expressed ministerial desire to meet the needs of PHC professionals to be supported in the clinical integration and improvement of AA in PHC settings. This study will provide an online reflective tool that will be

## AA Reflective tool development

used as requested by primary healthcare professionals seeking to improve their AA practice.

Self-reported tools are useful reflective strategies to support quality improvement as they are easily accessible and available when needed, regardless of location. These tools also provide an effective way to promote self-reflection and identification of strengths and areas in need.[26]

Some tools available online, provide diagnosis, document or assess a level of practice or alignment with goals such as those of the tool developed by the College of Family Physicians in Canada to assess the Patient-centered Medical Home[27] or the Universal Health Coverage Primary Health Care Self-Assessment Tool.[28] Online tools may also offer a reflective perspective to provide actionable advice,[27] or immediate results and guidance.[29]

There is a need to develop a self-reported online reflective tool to support AA implementation and improvement by PHC providers. To achieve this objective, it is important to ensure that there is consensus on the underlying model. Differences in definition or interpretation of the pillars of AA could lead to operationalization difficulties, that can and should be avoided.

## OBJECTIVES

The main objective of this study is to develop a self-reported reflective tool to support PHC providers to improve their AA practice.

The specific objectives are to:

- 1) Operationalize the pillars and sub-pillars of the AA model;
- 2) Develop a self-reported questionnaire on their practice in AA,
  - 2.1 Develop a questionnaire to assess the level of implementation of the AA model
  - 2.2 Identify key recommendations to improve AA.
- 3) Evaluate the psychometrics of the tool.

## AA Reflective tool development

1  
2  
3 The main deliverable of our study will be a self-reported reflective tool on AA that will be  
4  
5 combined with a repository of recommendations to improve AA, available on an electronic  
6  
7 platform easily accessible to PHC providers and teams. This includes: physicians, nurses and nurse  
8  
9 practitioners, social workers, pharmacists, nutritionists, psychologists, etc. Users will receive, in  
10  
11 one place, an evaluation of their AA practice and personalized recommendations to support  
12  
13 improvement.  
14

## METHODS

### Study design overview

15  
16  
17  
18  
19  
20  
21  
22 A modified Delphi methodology will be used, to develop a reflective tool and identity strategies  
23  
24 to improve AA. A literature review and analysis of selected articles will be used to identify  
25  
26 conceptual constructs, followed by an iterative consensus achievement process among key  
27  
28 experts including a face-to-face meeting and an online survey tool (e-Delphi).[30] Using an  
29  
30 iterative process, a Delphi consultation is an effective technique designed to obtain the most  
31  
32 reliable consensus within a group of experts regardless of their geographical spread.[31–33] A  
33  
34 group of experts from the province of Québec will include diverse providers such as family  
35  
36 physicians, nurse practitioners, nurses, front-desk and administrative staff and policymakers.  
37  
38 Grounding the initial Delphi round in concepts derived from literature and based on initial experts'  
39  
40 input during the face-to-face meeting will both be efficient, and will stimulate participation in the  
41  
42 following steps of the tool development.  
43  
44  
45

46  
47 The process entails three sequential phases, with phase 1 being qualitative, while phases 2 and 3  
48  
49 being including quantitation. Table 1 briefly presents all three phases with their specific  
50  
51 objectives. Phase 1 consists of a face-to-face meeting. This pre e-Delphi consultation aims to  
52  
53 establish common bases in the operationalization of a revised AA model (objective 1). Phase 2 will  
54  
55  
56  
57  
58  
59  
60

## AA Reflective tool development

consist of a three-round consultation to identify the content of the self-reported reflective tool.

Phase 3 will follow to assess the developed reflective tool and its applicability to different PHC professionals and in different PHC environments.

The self-reported reflective tool aims to evaluate the processes associated with each AA pillar while allowing its users to grasp their strengths and weaknesses with respect to their level of implementation.

**Table 1: The AA reflective tool development in brief**

|                                                                                                                                                                                                                          |                                                                                                                                                                                                                                                                                                                                                                                                                                                                                                                                                                                                                                                               |
|--------------------------------------------------------------------------------------------------------------------------------------------------------------------------------------------------------------------------|---------------------------------------------------------------------------------------------------------------------------------------------------------------------------------------------------------------------------------------------------------------------------------------------------------------------------------------------------------------------------------------------------------------------------------------------------------------------------------------------------------------------------------------------------------------------------------------------------------------------------------------------------------------|
| <p><b>Phase 1</b><br/> <b>Pre-Delphi consultation</b><br/>           Establishing common bases<br/>           – Operationalize the AA model</p>                                                                          | <ul style="list-style-type: none"> <li>- Research team identifies AA pillars and definitions from the literature</li> <li>- Identification and recruitment of AA experts</li> <li>- Consensus building on pillars and brainstorming about sub-pillars of AA through a facilitated face-to-face meeting</li> </ul>                                                                                                                                                                                                                                                                                                                                             |
| <p><b>Phase 2</b><br/> <b>e-Delphi consultation</b><br/>           Creation of the AA reflective tool<br/>           (List of essential items to be assessed in the reflective tool by PHC practitioners/clinicians)</p> | <p><b>1st round of consultation</b></p> <ul style="list-style-type: none"> <li>- Panel expert agreement scores (from 1 to 9) on sub-pillars and definitions</li> <li>- Suggestions/comments for modification or addition to sub-pillars</li> </ul>                                                                                                                                                                                                                                                                                                                                                                                                            |
|                                                                                                                                                                                                                          | <p><b>2<sup>nd</sup> round of consultation</b></p> <ul style="list-style-type: none"> <li>- Global and individual feedback report from round 1 (Level of consensus achieved, global and individual expert panel scores)</li> <li>- Panel expert agreement scores (from 1 to 9) on new propositions and modification emerging from round 1</li> <li>- Panel expert agreement scores (from 1 to 5) on the importance of each sub-pillar and the list of items to measure their level of implementation</li> <li>- Panel expert agreement (yes/no) on suggested response scales</li> <li>- Suggestions/comments for modification or addition of items</li> </ul> |
|                                                                                                                                                                                                                          | <p><b>3<sup>rd</sup> round of consultation</b></p> <ul style="list-style-type: none"> <li>- Global and individual feedback report from round 2 (Level of consensus achieved, global and individual expert panel scores)</li> <li>- Consensus building on items by pillar and sub-pillar<br/>           Suggestions for practical recommendations by item to provide to clinicians to improve their AA practice</li> </ul>                                                                                                                                                                                                                                     |

## AA Reflective tool development

|                                                                                                                                                                                               |                                                                                                                                                                                                                                                                                                                                                       |
|-----------------------------------------------------------------------------------------------------------------------------------------------------------------------------------------------|-------------------------------------------------------------------------------------------------------------------------------------------------------------------------------------------------------------------------------------------------------------------------------------------------------------------------------------------------------|
| <p><b>Phase 3</b><br/> <b>Piloting, adjustment and development of a repository of recommendations</b><br/>         To assess the tool and its applicability in different PHC environments</p> | <ul style="list-style-type: none"> <li>- Questionnaire completion by PHC clinicians in different PHC settings</li> <li>- Psychometric properties analyses</li> <li>- Focus groups to receive feedback and improvement tips</li> <li>- Final adjustments</li> <li>- Development of a repository of recommendations with actionable guidance</li> </ul> |
|-----------------------------------------------------------------------------------------------------------------------------------------------------------------------------------------------|-------------------------------------------------------------------------------------------------------------------------------------------------------------------------------------------------------------------------------------------------------------------------------------------------------------------------------------------------------|

**Study management**

The research team includes researchers with AA and methodological expertise, and PHC professionals including family physicians and nurses. The team will oversee the development and ongoing processes of the study, as well as major decisions regarding the selection of AA experts to invite to the face-to-face meeting (Phase 1) and to the e-Delphi consultation (Phase 2). They will also be involved in piloting material and instruments ahead of consultations.

**The expert panel**

To maximise the acceptability and usefulness of the reflective tool in Quebec's contemporary context, the research team will establish an AA expert panel comprised of provincial and local decision-makers, family physicians, practitioner and clinical nurses, continuous quality improvement officers, front desk, and administrative staff, as well as patients and researchers working in the field of AA. We will seek to bring together experts with diverse expertise based on their role in their own organization as well as at the local, regional or provincial level. Purposive and snowball sampling techniques will be used to identify eligible participants. Forty potential participants will first be approached and invited by the principal investigators by email to join the expert panel and to be part of the pre-Delphi meeting with the hope of recruiting and maintaining a sample of 20-25 experts across all 3 e-Delphi rounds. This is above the target of 10 to 18 individuals, to ensure the development of productive group dynamics and to maximize chances of reaching consensus among experts.[30] Participants will be considered for the panel if they are

## AA Reflective tool development

1  
2 working in PHC or belong to an organization working closely with PHC professionals, and have an  
3  
4 extensive experience with AA (5 years+) as a practitioner or manager. Practitioners and managers  
5  
6 who were involved in the development of the training sessions provided by the Quebec College  
7  
8 of Family Physicians will also be invited. [34] Strategies to maximize the retention rate include  
9  
10 personalized reminders from one of the principal investigators, with the goal of not losing more  
11  
12 than 30% of the participants over the 3 expected rounds. [30]  
13  
14  
15

**Phase 1: Operationalization of the AA model**

16  
17 Building a consensus around the AA model will first entail agreeing on the pillars and sub-pillars  
18  
19 that are essential to integrate in an AA practice in PHC. The starting point will be the conceptual  
20  
21 framework of the five guiding principles of AA developed by Murray and Berwick in 2003:[3] 1)  
22  
23 Balance supply and demand; 2) Reduce the backlog of previously scheduled appointments; 3)  
24  
25 Review the appointment system; 4) Integrate inter-professional practice; and 5) Develop  
26  
27 contingency plans (see Figure 1).  
28  
29  
30  
31

32  
33 Phase 1 will consist of a literature review to conceptualize a revised AA model. Search terms such  
34  
35 as “advanced access,” “open-access,” “same-day scheduling,” “timely access” and “AA  
36  
37 implementation” will be used. The literature review will include scientific studies and grey  
38  
39 literature reports at local, national, and international levels. This scan will allow us to delineate  
40  
41 the pillars and sub-pillars as defined in models of AA in the contemporary literature, as well as  
42  
43 constructs that need to be measured within each sub-pillar.  
44  
45

46  
47 Following revision by the research team, the revised AA model will be submitted to the AA expert  
48  
49 panel in a face-to-face meeting for discussions to build consensus while refining the pillars and  
50  
51 definitions. This in-person meeting will be highly interactive and use facilitation techniques for  
52  
53 group consultations, to encourage everyone’s participation. The meeting will be organized in two  
54  
55 steps. First, a variation of a “World Café” will be used to initiate and lead a collective reflection  
56  
57  
58  
59  
60

## AA Reflective tool development

1  
2  
3 around the AA pillars and definition identified by the research team. A World Café is a simple yet  
4  
5 powerful method to enable meaningful conversations driven by participants and the topics that  
6  
7 are relevant and important to them,[35,36] to lay the groundwork for common understandings.  
8  
9 Building on the results of the World Café, a “carousel brainstorming” technique will be used with  
10  
11 AA experts to brainstorm on important components to be included in each pillar. A Carousel  
12  
13 Activity is a communicative and interactive opportunity for participants to get up and move  
14  
15 around a room in a circular fashion, stopping intermittently to comment, discuss, or respond in  
16  
17 writing to probing headings/questions/topics/themes posted by a facilitator.[37] This technique  
18  
19 allows for small group discussion, followed by whole-group collective reflection.[38] Facilitation  
20  
21 techniques ensure that everyone is able to participate equally and is able to express his/her  
22  
23 viewpoint freely, while ignoring hierarchical concerns.[39] The results of this meeting will be  
24  
25 analyzed by the research team to come to a consensus on the conceptual model of AA including  
26  
27 the name, number of pillars, and definition of each identified pillar. This will serve as groundwork  
28  
29 for the e-Delphi consultation.  
30  
31  
32  
33  
34

### **Phase 2: Creation of the AA reflective tool through e-Delphi consultation**

35  
36  
37 Phase 2 will be conducted on an online survey tool (Survey Monkey platform). After each round,  
38  
39 a personalized report will be sent to each AA expert providing an overall view of responses as well  
40  
41 as their own, in an anonymized format. A list of processes to operationalize the various pillars and  
42  
43 sub-pillars developed during Phase 1 will be reviewed and adapted by the research team before  
44  
45 submission to the expert panel. The mandate of the panel will be to set the importance of the  
46  
47 suggested processes for each of the sub-pillars and to achieve a consensus on a final list of  
48  
49 processes, considered to be very important or essential for assessment of an AA practice. Experts  
50  
51 will also be surveyed regarding the adequacy of suggested response scales for each item of the  
52  
53 reflective AA tool.  
54  
55  
56  
57  
58  
59  
60

## AA Reflective tool development

**Round 1**

An individualized link to a personalized questionnaire will be sent to each AA expert. The first round of consultation will propose sub-pillars that have emerged from Phase 1. For each of the proposed sub-pillars, AA experts will be asked to rate their level of agreement (on a scale of 1 to 9) regarding the relevance of this sub-pillar to the concept of AA. The median as well as measures of dispersion will be used as indicators of the level of consensus. There is no commonly defined rule to determine achievement of consensus, so a pre-hoc decision was made to consider 75% agreement to be consensus. Based on applied methods to determine consensus in a Delphi, [40,41] we define the following three zones: a median between 7 and 9 indicates high relevance, a median between 1 and 3 indicates low relevance, and a middle zone relevance of a median between 4 and 6 where the relevance is uncertain. These sub-pillars will be retained for a second round of consultation. A 9-point evaluation scale was chosen for this phase to allow participants to express their perception of relevance of a sub-pillar using a wide range of possibilities. Experts will also be asked to provide their definition, to comment on the sub-pillar, to indicate if this sub-pillar is associated with the appropriate pillar, and to add any sub-pillars they think are missing along with suggested definitions.

**Round 2 and 3 surveys**

A feedback report from the previous round will accompany each new round of questionnaires, including the level of consensus achieved along with global and individual relevance scores for each item. In rounds 2 and 3 (and further if needed) the importance of the suggested items will be rated using 5-point Likert scale. The specification of each element of the response scale (1=Not important at all, 2=Little important, 3=Somewhat important, 4=Very important and 5=Essential) is intended to simplify the respondents' burden of response while adding clarity to the responses obtained. Consensus will be attained if 75% of respondents rate an item "Very important" or



## AA Reflective tool development

1  
2  
3 “Essential.” More specifically, consensus will be reached with a median rating of 4 or more, with  
4 an interquartile range (IQR) of less than 1. If an item is rated below 4 by more than 25% of  
5 respondents, this be interpreted to be non-consensus. AA experts will be given the opportunity  
6 to modify their initial response in light of the answers provided from the group, so as to facilitate  
7 the group evolution towards consensus. [33,42] They will also be asked to score new propositions  
8 and modifications emerging from the previous round. The process will continue with further  
9 rounds until a consensus on the importance of each item is reached - or not.[33,42] The e-Delphi  
10 rounds will cease when an acceptable degree of consensus is reached.[43,44] Particular attention  
11 will be given following each round to assess whether consensus has been reached over a  
12 particular round, or rather evolved throughout the process, and whether the group's opinion has  
13 changed over the rounds.[45] Phase 2 will result in the creation of the online reflective tool based  
14 on the list of items for which consensus was achieved, to rigorously assess the processes required  
15 in an AA practice.

### **Phase 3: Assessment and applicability of the newly developed AA reflective tool and development of a repository of recommendations**

16  
17  
18  
19  
20  
21  
22  
23  
24  
25  
26  
27  
28  
29  
30  
31  
32  
33  
34  
35  
36  
37  
38 A sub-group of 5 to 10 AA experts who participated in phases 1 and/or 2 will be consulted to  
39 formulate and prioritize recommendations for an optimal AA practice.  
40  
41  
42

### **AA reflective tool refinement**

43  
44  
45  
46 Survey completion sessions will be organized with PHC professionals and staff from five different  
47 PHC clinics, who will not have been involved in the previous phases of the study. These survey  
48 completion sessions will include feedback discussions on the completion of the tool, and will be  
49 led by the research team. Following cognitive testing techniques[46], these sessions are intended  
50 to identify items that are not clear or need to be reformulated, as well as any difficulties  
51  
52  
53  
54  
55  
56  
57  
58  
59  
60

## AA Reflective tool development

1  
2 encountered during completion of the questionnaire. Following this piloting and development  
3  
4 period, the AA reflective tool will be considered to be final, and ready to be evaluated by a larger  
5  
6 number of potential users.  
7  
8  
9

### **Development of a repository of recommendations**

10  
11 A repository of recommendations aligned with the different components of the revised AA model  
12  
13 will be created, in relation to the result obtained after the completion of the tool. This repository  
14  
15 of recommendations will be made available through the electronic platform, upon completion of  
16  
17 the evaluation using the AA reflective tool. Recommendations will be personalized according to  
18  
19 the professional “portrait” based on their score on each pillar, providing them with actionable  
20  
21 avenues. Such an approach was inspired by the primary care quality improvement tool of the  
22  
23 College of Family Physicians of Canada.[27]  
24  
25  
26  
27

28  
29 The repository of recommendations will be inspired by systematic collation of best practices, by  
30  
31 reviewing the literature related to each of the components of AA (e.g., improving interprofessional  
32  
33 collaboration, optimization of telephone reception, managing escalation of emergencies) and  
34  
35 using feedback generated by the expert panel on the final e-Delphi round. Implementation guides  
36  
37 as well as locally developed help-tools will serve as sources of recommendations for the repository  
38  
39 and will be expanded with experiences of AA experts and their close collaborators. The repository  
40  
41 will be expanded and refined during the third round of the e-Delphi and during the survey  
42  
43 completion sessions. If discussion of recommendations cannot be addressed in the 3<sup>rd</sup> round of  
44  
45 the e-Delphi, we will bring the discussion to experts in an additional face-to-face or virtual  
46  
47 meeting.”  
48  
49  
50  
51

### **Assessing the psychometric properties of the Reflective tool**

## AA Reflective tool development

1  
2  
3 The final step of development of the tool will consist of the evaluation of some of its psychometric  
4  
5 properties. To do so, we plan to recruit a minimum of 150 to 200 PHC professionals in at least 10  
6  
7 PHC clinics that have not been involved in the development of the tool.[47] The family physicians,  
8  
9 nurses and other professionals working in those PHC clinics will be asked to complete the newly  
10  
11 developed tool and comment on its content. Following qualitative feedback, the first analysis will  
12  
13 be at the item level: after excluding items with more than 4% missing values, we will do an item  
14  
15 discrimination analysis to learn how well an item can discriminate between high and low AA  
16  
17 performers. Items with a lack of variation in responses – i.e., that are either too easy to or too  
18  
19 difficult to attain – will be reviewed for content and adequacy of the response scale. Other  
20  
21 properties tested will be the tool's reliability (repeatability, and intra- and inter-reliability in  
22  
23 different contexts or between different types of healthcare professionals), and validity (construct  
24  
25 validity with a confirmatory factor analysis). Finally, internal consistency will be analyzed for each  
26  
27 pillar and sub-pillar.  
28  
29  
30  
31

## 32 Patient and public involvement

33  
34  
35  
36 At least two patients will be invited to the face-to-face meeting in phase 1 as well as the  
37  
38 e-Delphi survey. We also intend to consult the patient partners' group related to our research  
39  
40 infrastructure at the end of the tool development to discuss issues that may have arisen and  
41  
42 could require a patient point of view. This group is composed of 5 patients partners involved in  
43  
44 different research project on AA.  
45  
46  
47

## 48 Ethics and dissemination

49  
50 Ethics and consent for participation will be sought at each phase of the study. Participation in a  
51  
52 meeting or completion of an electronic survey will be considered to be consent for participation  
53  
54 and use of anonymized data; as in focus groups or individual interviews, a written consent will be  
55  
56  
57  
58  
59  
60

## AA Reflective tool development

sought.

The results dissemination plan includes communications through the PHC community including our partner organizations, and to the scientific community via the peer-reviewed literature and conferences. We will attempt to reach many PHC professionals to let them know of our findings through professional organisations and by organising a symposium that will bring together our expert participants as well as colleagues from their organisations or from other organisations and PHC clinics. As so, elements and lessons learned from this study will be shared through multiple community media resources, including presentations and webinars, newsletters, and a symposium on AA initiated by the research team.

## DISCUSSION

Scientific articles on the foundations of AA have been published over the past 20 years. During this time interdisciplinary collaborative practice has evolved within PHC family practices, with several healthcare professionals now being part of the PHC team. This study will help to redefine the foundations of the AA model by integrating an interdisciplinary team-based focus, while considering changes that have been put in place in PHC practices. The inclusion of various PHC stakeholders in the tool development process will allow the tool and its content to reflect realities experienced in the field. Participation of AA champions in the overall development process of the AA reflective tool will benefit the community's acceptance of the tool.

This study will provide a rigorously developed up-to-date AA reflective tool based on the literature and on the experiences of various PHC stakeholders, while providing a response to their expressed needs for a reflective tool. The newly developed reflective tool will be helpful as the Ministry of Health and Social Services and professional medical organisations are currently promoting AA in PHC settings and other professional associations across Canada. Timely access is a key pillar of

## AA Reflective tool development

1  
2  
3  
4  
5  
6  
7  
8  
9  
10  
11  
12  
13  
14  
15  
16  
17  
18  
19  
20  
21  
22  
23  
24  
25  
26  
27  
28  
29  
30  
31  
32  
33  
34  
35  
36  
37  
38  
39  
40  
41  
42  
43  
44  
45  
46  
47  
48  
49  
50  
51  
52  
53  
54  
55  
56  
57  
58  
59  
60

PCMH, a well-known model to guide the developed of PHC around the world. The reflective tool on AA developed in this study will be available for use and adaptation in different countries.

The repository of recommendations developed in parallel with the tool will provide the AA tool users with advice in relation with their own AA evaluation, and provide pragmatic and personalized recommendations to improve their AA practice. This will all be conveniently available online.

### List of abbreviations

AA: Advanced access

PHC: Primary healthcare

PCMH: Patient-centered medical home

IQR: Interquartile range

### Figures

Figure 1. The five pillars of advanced access. The figure shows the Advanced access model with the original five pillars and guiding principles. This is used as a starting point for this proposal.

### DECLARATIONS

#### Ethics approval and consent to participate

The protocol for this study has been reviewed and approved by the Scientific Research Committee

AA Reflective tool development

and ethics provided by the Research Ethics Board of the Centre Intégré de Santé et de Services Sociaux de la Montérégie-Centre (CISSS MC) (2020-441, CP 980475).

### **Consent for publication**

Not applicable

### **Availability of data and material**

Not applicable

### **Authors' contributions**

MB and IG led the conceptualization and design of the study, but all authors were involved. MB, IG and CB will lead the coordination of the study. MB, IG and CB wrote the first draft and MS, SAM, CH, IR, LM, AD, NDS and JH critically reviewed it and provided comments to improve the first draft and the revised version of the manuscript. All authors (MB, IG, CB, MS, SAM, CH, IR, LM, AD, NDS and JH) read and approved the final version.

### **Competing interests**

The authors declare that they have no competing interests.

### **Funding**

This study received a two years funding from the Ministry of Health and Social Services of Quebec (MSSS) of \$500 000. The funding organization was not involved in the design of the study nor writing of the protocol (980475).

### **Acknowledgements**

The authors thank Meg Sears for scientific and linguistic editing.

## AA Reflective tool development

## REFERENCES

- 1 Ansell D, Crispo JAG, Simard B, *et al.* Interventions to reduce wait times for primary care appointments: a systematic review. *BMC Health Serv Res* 2017;**17**:295. doi:10.1186/s12913-017-2219-y
- 2 Collège des médecins de famille du Canada. Une vision pour le Canada. La pratique de la médecine familiale : Le centre de médecine de famille. Mississauga, ON. 2011. [https://www.google.com/url?sa=t&rct=j&q=&esrc=s&source=web&cd=&cad=rja&uact=8&ved=2ahUKEwjyqbO75rjqAhU1YTUKHSQPDncQFjACegQIAxAB&url=https%3A%2F%2Fwww.cfpc.ca%2FuploadedFiles%2FAbout\\_Us%2FFM-Professional-Profile-FR.pdf&usg=AOvVaw3wJlJ3K5ttqlxdotLSRz5L](https://www.google.com/url?sa=t&rct=j&q=&esrc=s&source=web&cd=&cad=rja&uact=8&ved=2ahUKEwjyqbO75rjqAhU1YTUKHSQPDncQFjACegQIAxAB&url=https%3A%2F%2Fwww.cfpc.ca%2FuploadedFiles%2FAbout_Us%2FFM-Professional-Profile-FR.pdf&usg=AOvVaw3wJlJ3K5ttqlxdotLSRz5L)
- 3 Murray M, Berwick DM. Advanced access: reducing waiting and delays in primary care. *JAMA* 2003;**289**:1035–40.
- 4 Abou Malham S, Touati N, Maillet L, *et al.* What Are the Factors Influencing Implementation of Advanced Access in Family Medicine Units? A Cross-Case Comparison of Four Early Adopters in Quebec. *International Journal of Family Medicine* 2017;**2017**:1–15. doi:10.1155/2017/1595406
- 5 Bundy DG, Randolph GD, Murray M, *et al.* Open access in primary care: results of a North Carolina pilot project. *Pediatrics* 2005;**116**:82–7.
- 6 Rose KD, Ross JS, Horwitz LI. Advanced access scheduling outcomes: a systematic review. *Archives of internal medicine* 2011;**171**:1150–9. doi:10.1001/archinternmed.2011.168
- 7 Fournier J, Heale R, Rietze LL. I can't wait: advanced access decreases wait times in primary healthcare. *Healthcare quarterly (Toronto, Ont)* 2012;**15**:64–8.
- 8 Hudec JC, MacDougall S, Rankin E. Advanced access appointments: Effects on family physician satisfaction, physicians' office income, and emergency department use. *Canadian family physician Medecin de famille canadien* 2010;**56**:e361–7.
- 9 Rivas J. Advanced Access Scheduling in Primary Care: A Synthesis of Evidence. *Journal of Healthcare Management* 2020;**65**:171–84. doi:10.1097/JHM-D-19-00047
- 10 Belardi FG, Weir S, Craig FW. A controlled trial of an advanced access appointment system in a residency family medicine center. *Family medicine* 2004;**36**:341–5.
- 11 Bennett CC. A healthier future for all Australians: an overview of the final report of the National Health and Hospitals Reform Commission. *The Medical journal of Australia* 2009;**191**:383–7.
- 12 Ahluwalia S, Offredy M. A qualitative study of the impact of the implementation of advanced access in primary healthcare on the working lives of general practice staff. *BMC family practice* 2005;**6**:39.
- 13 College of Family Physicians of Canada. Best Advice- Timely Access to Appointments in Family Practice.

## AA Reflective tool development

- 1  
2  
3 2012. [https://portal.cfpc.ca/ResourcesDocs/uploadedFiles/Health\\_Policy/\\_PDFs/2012\\_Final\\_Best\\_Advice\\_Enhancing\\_Timely\\_Access.pdf](https://portal.cfpc.ca/ResourcesDocs/uploadedFiles/Health_Policy/_PDFs/2012_Final_Best_Advice_Enhancing_Timely_Access.pdf)
- 4  
5  
6 14 Lemire F. Refreshing the Patient's Medical Home: New vision for providing exceptional care in family practice. *Canadian family physician Medecin de famille canadien* 2019;**65**:152.
- 7  
8  
9 15 Gaboury I, Breton M, Perreault K, *et al.* Interprofessional advanced access – a quality improvement protocol for expanding access to primary care services. *BMC Health Serv Res* 2021;**21**:812. doi:10.1186/s12913-021-06839-w
- 10  
11  
12  
13 16 Breton M, Maillet L, Paré I, *et al.* Perceptions of the first family physicians to adopt advanced access in the province of Quebec, Canada. *The International journal of health planning and management* 2017;**32**:e316–32. doi:10.1002/hpm.2380
- 14  
15  
16  
17 17 Breton M, Maillet L, Duhoux A, *et al.* Evaluation of the implementation and associated effects of advanced access in university family medicine groups: a study protocol. *BMC family practice* 2020;**21**:41. doi:10.1186/s12875-020-01109-w
- 18  
19  
20  
21  
22 18 Brazeau S, Couture P, Karemere-Bimana H, *et al.* *Guide pour l'implantation de l'accès adapté: l'expérience d'une région : Laval*. Laval: : Centre intégré de santé et de services sociaux de Laval 2016.
- 23  
24  
25 <http://www.santecom.qc.ca/Bibliothequevirtuelle/Laval/9782550744337.pdf> (accessed 17 Jul 2020).
- 26  
27  
28  
29 19 Centre intégré de santé et de services sociaux du Bas Saint-Laurent. Outils, Zone professionnelle, Accès Adapté. 2020. <https://www.ciass-bsl.gouv.qc.ca/zone-professionnelle/acces-adapte/outils> (accessed 12 Aug 2020).
- 30  
31  
32  
33 20 Health Quality Ontario. Quality Improvement e-Learning Modules: Timely Access to Primary Care. [hqontario.ca. https://www.hqontario.ca/Quality-Improvement/E-Learning-and-Events/E-Learning-Modules-Timely-Access-to-Primary-Care](https://www.hqontario.ca/Quality-Improvement/E-Learning-and-Events/E-Learning-Modules-Timely-Access-to-Primary-Care) (accessed 12 Aug 2020).
- 34  
35  
36  
37 21 Institute of Medicine (U.S.), Kaplan G, Lopez MH, *et al.*, editors. *Transforming health care scheduling and access: getting to now*. Washington, D.C.: The National Academies Press 2015.
- 38  
39  
40  
41  
42 22 Lukas C, Meterko M, Mohr D, Marjorie, Seibert N. The implementation and effectiveness of advanced clinic access.
- 43  
44 [2004. https://www.researchgate.net/publication/228478818\\_The\\_Implementation\\_and\\_Effectiveness\\_of\\_Advanced\\_Clinic\\_Access/citation/download](https://www.researchgate.net/publication/228478818_The_Implementation_and_Effectiveness_of_Advanced_Clinic_Access/citation/download)
- 45  
46  
47 23 Institute for Health Improvement. Primary Care Access.
- 48 <http://www.ihl.org/Topics/PrimaryCareAccess/Pages/default.aspx> (accessed 12 Aug 2020).
- 49  
50  
51 24 Practice Management Network. Improving access, responding to patients. A 'how-to' guide for GP practices. 2009. <https://www.choiceforum.org/docs/gpguide.pdf> (accessed 12 Aug 2020).
- 52  
53  
54  
55 25 Langley GJ, editor. *The improvement guide: a practical approach to enhancing organizational performance*. 2nd ed. San Francisco: : Jossey-Bass 2009.
- 56  
57  
58  
59  
60



## AA Reflective tool development

- 1  
2  
3 26 Stenov V, Wind G, Skinner T, *et al*. The potential of a self-assessment tool to identify  
4 healthcare professionals' strengths and areas in need of professional development to aid  
5 effective facilitation of group-based, person-centered diabetes education. *BMC Med Educ*  
6 2017;**17**:166. doi:10.1186/s12909-017-1003-3  
7  
8 27 The College of Family Physicians of Canada. The self-assessment tool for the Patient's  
9 Medical Home. 2018.<https://patientsmedicalhome.ca/self-assess/> (accessed 12 Aug 2020).  
10  
11 28 The Joint Learning Network for Universal Health Coverage. UHC Primary Health Care Self-  
12 Assessment Tool. 2015.  
13  
14 29 The American Medical Association. The Caregiver Self-Assessment Tool. Healthinaging.com:  
15 Trusted information. Better care. 2015.[https://www.healthinaging.org/tools-and-](https://www.healthinaging.org/tools-and-tips/caregiver-self-assessment-questionnaire)  
16 [tips/caregiver-self-assessment-questionnaire](https://www.healthinaging.org/tools-and-tips/caregiver-self-assessment-questionnaire) (accessed 17 Aug 2020).  
17  
18 30 Veugelers R, Gaakeer MI, Patka P, *et al*. Improving design choices in Delphi studies in  
19 medicine: the case of an exemplary physician multi-round panel study with 100% response.  
20 *BMC Med Res Methodol* 2020;**20**:156. doi:10.1186/s12874-020-01029-4  
21  
22 31 Jünger S, Payne SA, Brine J, *et al*. Guidance on Conducting and REporting DELphi Studies  
23 (CREDES) in palliative care: Recommendations based on a methodological systematic  
24 review. *Palliat Med* 2017;**31**:684–706. doi:10.1177/0269216317690685  
25  
26 32 Falzarano M, Pinto G. Seeking Consensus Through the Use of the Delphi Technique in Health  
27 Sciences Research. *Journal of Allied Health* 2013;**42**:99–105.  
28  
29 33 Hsu C-C, Sandford BA. The Delphi Technique: Making Sense of Consensus. *Practical*  
30 *assessment, research and evaluation* 2007;**12**:1–6. doi:10.7275/PDZ9-TH90  
31  
32 34 Accès adapté, organisation de la pratique: L'accès adapté en un clic ! Fédération des  
33 médecins omnipraticiens du Québec. 2015.[https://www.fmoq.org/pratique/organisation-](https://www.fmoq.org/pratique/organisation-de-la-pratique/acces-adapte/)  
34 [de-la-pratique/acces-adapte/](https://www.fmoq.org/pratique/organisation-de-la-pratique/acces-adapte/) (accessed 12 Aug 2020).  
35  
36 35 Hyper Island. SessionLab. <https://www.sessionlab.com/methods/world-cafe> (accessed 12  
37 Aug 2020).  
38  
39 36 The world cafe. 2020.[http://www.theworldcafe.com/key-concepts-resources/world-cafe-](http://www.theworldcafe.com/key-concepts-resources/world-cafe-method/)  
40 [method/](http://www.theworldcafe.com/key-concepts-resources/world-cafe-method/) (accessed 12 Aug 2020).  
41  
42 37 Delgado RA. Carousel activity protocol. Utica College.  
43 2020.[https://www.uticaschools.org/site/handlers/filedownload.ashx?moduleinstanceid=%2](https://www.uticaschools.org/site/handlers/filedownload.ashx?moduleinstanceid=%20273&dataid=286&FileName=Carousel%20Activity%20Protocol.pdf)  
44 [0273&dataid=286&FileName=Carousel%20Activity%20Protocol.pdf](https://www.uticaschools.org/site/handlers/filedownload.ashx?moduleinstanceid=%20273&dataid=286&FileName=Carousel%20Activity%20Protocol.pdf) (accessed 12 Aug 2020).  
45  
46 38 Simon CA. Strategy Guide: Brainstorming and Reviewing Using the Carousel Strategy.  
47 ReadWriteThink. 2020.[http://www.readwritethink.org/professional-development/strategy-](http://www.readwritethink.org/professional-development/strategy-guides/brainstorming-reviewing-using-carousel-30630.html)  
48 [guides/brainstorming-reviewing-using-carousel-30630.html](http://www.readwritethink.org/professional-development/strategy-guides/brainstorming-reviewing-using-carousel-30630.html) (accessed 12 Aug 2020).  
49  
50 39 Liberating structures. 2020.<http://www.liberatingstructures.com/> (accessed 12 Aug 2020).  
51  
52 40 K Fitch, SJ Bernstein, MD Aguilar, B Burnand, JR LaCalle, P Lazaro, MVH Loo, J McDonnell, JP  
53  
54  
55  
56  
57  
58  
59  
60

## AA Reflective tool development

- 1  
2  
3 Vader, JP Kahan. The RAND/UCLA Appropriateness Method Users' Manual.  
4 2001. <https://apps.dtic.mil/dtic/tr/fulltext/u2/a393235.pdf>  
5
- 6 41 CE Dionne, V Tremblay-Boudreault. Chapitre 7 - L'APPROCHE DELPHI, Application dans la  
7 conception d'un outil clinique en réadaptation au travail en santé mentale. In: *Méthodes*  
8 *qualitatives, quantitatives et mixtes, 2e édition: Dans la ...À la moitié du*  
9 *doc.* [https://books.google.fr/books?hl=fr&lr=&id=ngv5DwAAQBAJ&oi=fnd&pg=PT176&dq=exemple+de+delphi&ots=zRUJXdPw&sig=eAHPvsx9vug44njNwU-](https://books.google.fr/books?hl=fr&lr=&id=ngv5DwAAQBAJ&oi=fnd&pg=PT176&dq=exemple+de+delphi&ots=zRUJXdPw&sig=eAHPvsx9vug44njNwU-fMO4vGQQ#v=onepage&q=exemple%20de%20delphi&f=false)  
10 [fMO4vGQQ#v=onepage&q=exemple%20de%20delphi&f=false](https://books.google.fr/books?hl=fr&lr=&id=ngv5DwAAQBAJ&oi=fnd&pg=PT176&dq=exemple+de+delphi&ots=zRUJXdPw&sig=eAHPvsx9vug44njNwU-fMO4vGQQ#v=onepage&q=exemple%20de%20delphi&f=false) (accessed 6 Nov 2020).  
11  
12
- 13 42 Hsu C-C, Sandford B. Minimizing Non-Response in The Delphi Process: How to Respond to  
14 Non-Response. *Practical Assessment, Research, and Evaluation* 2007;**12**.  
15 [doi:https://doi.org/10.7275/by88-4025](https://doi.org/10.7275/by88-4025)  
16  
17
- 18 43 J. Skulmoski G, T. Hartman F, Krahn J. The Delphi Method for Graduate Research.  
19 *JITE:Research* 2007;**6**:001–21. [doi:10.28945/199](https://doi.org/10.28945/199)  
20
- 21 44 de Villiers MR, de Villiers PJT, Kent AP. The Delphi technique in health sciences education  
22 research. *Medical teacher* 2005;**27**:639–43.  
23
- 24 45 Holely EA, Feeley JL, Dixon J, *et al.* An exploration of the use of simple statistics to measure  
25 consensus and stability in Delphi studies. *BMC medical research methodology* 2007;**7**:52.  
26  
27
- 28 46 Willis GB. *Analysis of the cognitive interview in questionnaire design*. Oxford: : Oxford  
29 University Press 2015.  
30
- 31 47 Martin CR; Hollins Martin CJ. Minimum sample size requirements for a validation study of  
32 the birth satisfaction scale-revised (BSS-R). *Journal of Nursing and Practice* 2017;**1**:25–30.  
33  
34  
35  
36  
37  
38  
39  
40  
41  
42  
43  
44  
45  
46  
47  
48  
49  
50  
51  
52  
53  
54  
55  
56  
57  
58  
59  
60



Figure 1. The five pillars of advanced access. The figure shows the Advanced Access model with the original five pillars and guiding principles. This is used as a starting point for this proposal.access initial development.

174x139mm (96 x 96 DPI)
